Review Article

# A Systematic Review and Meta-analysis of Paediatric Inflammatory Bowel Disease Incidence and Prevalence Across Europe

S. E. Roberts,<sup>a</sup> K. Thorne,<sup>a</sup> N. Thapar,<sup>b,c,o,p</sup> I. Broekaert,<sup>d</sup> M. A. Benninga,<sup>e</sup> J. Dolinsek,<sup>f</sup> E. Mas,<sup>g</sup> E. Miele,<sup>h</sup> R. Orel,<sup>i,j</sup> C. Pienar,<sup>k</sup> C. Ribes-Koninckx,<sup>l</sup> M. Thomson,<sup>m</sup> C. Tzivinikos,<sup>n</sup> S. Morrison-Rees,<sup>a</sup> A. John,<sup>a</sup> J. G. Williams<sup>a</sup>

<sup>a</sup>Medical School, Swansea University, Swansea, Wales, UK <sup>b</sup>Neurogastroenterology and Motility Unit, Department of Gastroenterology, Great Ormond Street Hospital, London, UK <sup>c</sup>Stem Cells and Regenerative Medicine, UCL Great Ormond Street Institute of Child Health, London, UK <sup>d</sup>Department of Paediatrics, University Children's Hospital, University of Cologne, Cologne, Germany <sup>e</sup>Amsterdam UMC, University of Amsterdam, Emma Children's Hospital, Department of Pediatric Gastroenterology, Hepatology and Nutrition, Amsterdam, The Netherlands <sup>f</sup>Department of Pediatrics, University Medical Center Maribor, Maribor, Slovenia <sup>g</sup>Unité de Gastroentérologie, Hépatologie, Nutrition, Diabétologie et Maladies Héréditaires, du Métabolisme, Hôpital des Enfants, CHU de Toulouse, Toulouse, France; IRS, Université de Toulouse, INSERM, INRA, ENVT, UPS, Toulouse, France <sup>h</sup>Department of Translational Medical Science, Section of Pediatrics, University of Naples 'Federico II', Naples, Italy <sup>i</sup>Department of Gastroenterology, Hepatology and Nutrition, Children's Hospital, University Medical Centre, 1000 Ljubljana, Slovenia <sup>j</sup>Faculty of Medicine, University of Ljubljana, 1000 Ljubljana, Slovenia <sup>k</sup>Department of Pediatrics, 'Victor Babes' University of Medicine and Pharmacy, Timisoara, Romania <sup>l</sup>Department of Paediatric Gastroenterology, Hepatology & Nutrition, La FE University Hospital, Valencia, Spain <sup>m</sup>Centre for Paediatric Gastroenterology, Sheffield Children's Hospital, Sheffield, UK <sup>n</sup>Department of Paediatric Gastroenterology, Al Jalila Children's Specialty Hospital, Dubai, UAE <sup>o</sup>Prince Abdullah Ben Khalid Celiac Research Chair, College of Medicine, King Saud University, Riyadh, Saudi Arabia <sup>p</sup>Gastroenterology, Hepatology and Liver Transplant, Queensland Children's Hospital, Brisbane, Australia

Corresponding author: Dr Stephen E. Roberts, Medical School, Swansea University, Swansea SA2 8PP, UK. Tel: 01792 513433; Email: [stephen.e.roberts@swansea.ac.uk](mailto:stephen.e.roberts@swansea.ac.uk)

## Abstract

**Background and Aims:** Inflammatory bowel disease [IBD] is often one of the most devastating and debilitating chronic gastrointestinal disorders in children and adolescents. The main objectives here were to systematically review the incidence and prevalence of paediatric IBD across all 51 European states.

**Methods:** We undertook a systematic review and meta-analysis based on PubMed, CINAHL, the Cochrane Library, searches of reference lists, grey literature and websites, covering the period from 1970 to 2018.

**Results:** Incidence rates for both paediatric Crohn's disease [CD] and ulcerative colitis [UC] were higher in northern Europe than in other European regions. There have been large increases in the incidence of both paediatric CD and UC over the last 50 years, which appear widespread across Europe. The largest increases for CD have been reported from Sweden, Wales, England, the Czech Republic, Denmark and Hungary, and for UC from the Czech Republic, Ireland, Sweden and Hungary. Incidence rates for paediatric CD have increased up to 9 or 10 per 100 000 population in parts of Europe, including Scandinavia, while rates for paediatric UC are often slightly lower than for CD. Prevalence reported for CD ranged from 8.2 per 100 000 to approximately 60 and, for UC, from 8.3 to approximately 30.

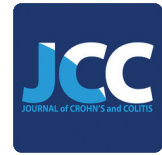

**Conclusions:** The incidence of paediatric IBD continues to increase throughout Europe. There is stronger evidence of a north–south than an east–west gradient in incidence across Europe. Further prospective studies are needed, preferably multinational and based on IBD registries, using standardized definitions, methodology and timescales.

**Key Words:** Inflammatory bowel disease, paediatric, Europe, incidence, trends

## 1. Introduction

The incidence of inflammatory bowel disease [IBD] usually peaks during adolescence or early adulthood with up to one-quarter of all cases diagnosed before the age of 18 years.<sup>1–3</sup> The development of IBD during childhood, rather than adulthood, is thought to involve increased, earlier exposure to environmental triggers and greater genetic susceptibility.<sup>4</sup> Information on patterns of paediatric IBD incidence over time and geographically across Europe can provide insight as to whether changes in environmental factors are involved in modifying disease pathology. It can also be used to inform future resource allocation and for targeting services.

In 2013, United European Gastroenterology commissioned the authors to review the disease burden of all major gastrointestinal disorders and the organization and delivery of gastroenterology services across 35 European countries from 1990 to 2014.<sup>5</sup> This systematic review and meta analysis provides a more detailed and focused analysis of the incidence and prevalence of paediatric IBD across all 51 European states since 1970, updated to the end of December 2018.

There have been several previous reviews of the epidemiology of paediatric IBD,<sup>2–4,6,7</sup> although these have been worldwide in scope rather than focused on all European countries,<sup>2–4,6,7</sup> were structured or narrative rather than fully systematic reviews,<sup>3,4,6,7</sup> or are now becoming dated.<sup>2</sup> The main purpose of this review is to fill the gaps in the evidence base for paediatric IBD across Europe, by providing a systematic review across all 51 European nation states to the end of 2018.

Specific study objectives were: first, to systematically review the incidence and prevalence of paediatric IBD across Europe from 1970 to 2018; second, to assess regional variation in paediatric IBD incidence and prevalence across Europe; third, to analyse trends over time in paediatric IBD incidence, overall and according to age group at disease onset; and, fourth, to assess paediatric IBD incidence and prevalence according to study case ascertainment and design.

## 2. Methods

### 2.1. Scope

This systematic review covered all 51 European states across Europe, over the 49-year period from January 1, 1970 to December 31, 2018. There are few European studies of IBD incidence or prevalence before 1970, they typically reported very low incidences of paediatric IBD, based on a few cases and are mostly from Scandinavia. Where study time periods overlapped the 1960s and 1970s, only those with the majority of the study period since 1970 were included. The review assessed Crohn's disease [CD], ulcerative colitis [UC] and indeterminate colitis [otherwise termed unclassified colitis] separately and included studies written in all European languages.

To assess geographical patterns in paediatric IBD incidence across Europe, the 51 states were grouped into the following four regions:

- Northern Europe [Denmark, Finland, Iceland, Ireland, Norway, Sweden and the UK – England, Wales, Scotland and Northern Ireland]
- Western Europe [Austria, Belgium, France, Germany, Liechtenstein, Luxembourg, Monaco, the Netherlands and Switzerland]
- Eastern Europe [Armenia, Azerbaijan, Belarus, Bulgaria, the Czech Republic, Estonia, Georgia, Hungary, Kazakhstan, Latvia, Lithuania, Moldova, Poland, Romania, Russia, Slovakia and the Ukraine]
- Southern Europe [Albania, Andorra, Bosnia and Herzegovina, Croatia, Cyprus, Greece, Italy, Kosovo, Macedonia, Montenegro, Malta, Portugal, San Marino, Serbia, Slovenia, Spain, Turkey and the Vatican City]

### 2.2. Inclusion and exclusion criteria

This systematic review included reports on population-based incidence or prevalence of paediatric IBD from cohort studies, patient case series or population-based studies. The review included studies of paediatric and/or adolescent age ranges spanning from 0 years to 14, 15 or up to 18 years, depending on the age ranges used in each study. Where it was not possible to disaggregate the reported age groups, the review also included studies of ages up to 19 and, in one case, 20 years.

The review excluded several types of study design. These were, first, studies based exclusively on primary care consultations, as they can reflect health-seeking behavioural patterns rather than actual incidence of IBD. Second, the review excluded studies based solely on inpatient admissions from administrative data as these often refer mainly to acute cases which do not cover all cases of IBD, while trends in their rates can reflect organizational changes in the provision of inpatient care rather than actual changes in incidence. Third, a few studies based solely on capture–recapture methodology were excluded as this method can be unreliable for studies of human populations. Fourth, studies based entirely on health insurance data were excluded, unless the population coverage of the insurance schemes was known to be [approximately] complete so that the incidence and/or prevalence reported would be accurate. Studies that covered <3 cases of IBD were also excluded. Where two publications reported exactly the same incidence or prevalence of IBD from the same location during the same time period, only the first study identified was included. The review excluded reports with study case ascertainment and other methodology not described or described inadequately, including some abstracts or other short publications and also studies that were not based on clinical diagnoses, histopathology or radiological findings. Studies that covered limited age ranges, such as <10 or 10–19 years, have been reported separately, as the incidence of IBD often increases sharply from the ages of 10+ or 15+ years.

### 2.3. Search criteria and data extraction

The systematic review used the PubMed, CINAHL and Cochrane Library medical literature databases. The search terms used are listed in [Appendix 1](#). Additional literature was identified through hand searching of reference lists and searches of grey literature and websites. Eligible studies were reviewed for inclusion against the stated inclusion and exclusion criteria and STROBE guidelines.<sup>8</sup> The review included literature published, in press or in the public domain as of December 31, 2018.

The PRISMA flow diagram in [Figure 1](#) shows the numbers of studies included at each stage of screening for the review. The following data items were extracted using a designed data extraction sheet: country and region, study design and information sources used, study time period, patient age details, number of cases, population incidence and prevalence of IBD, study authors and reference. When extracting information from the studies, pairs of investigators/researchers consulted to compare findings and reach consensus. Where consensus was not reached, another investigator was consulted.

### 2.4. Geographical and statistical methods

Geographical Information System [GIS] mapping was used to illustrate the incidence of paediatric CD and UC across Europe. The software used was QGIS.<sup>9</sup> In these maps, the countries were grouped

into quintiles according to incidence rates, with quintiles comprising equal numbers of countries in each quintile. The incidence rates were based on a meta-analysis of rates from studies within each country, with precedence given to national or nationally representative studies and the most recent study time periods. In the absence of national studies, incidence rates from other studies were combined and weighted by study size. In the maps provided, only those countries based on national studies are shaded, with details of the non-national studies provided separately in tabular format.

Time trend analyses and mean annual changes in incidence rates were used to assess changes over time in disease incidence. To eliminate possible biases from methodological variation across studies, the time trend analyses were confined to comparisons within longitudinal studies and excluded comparisons across different studies. The time trends were presented graphically with mid-points that were spaced, where possible, at approximately 4 years apart. The review assessed trends in incidence according to the age group at disease onset, which varied across studies from 0–5, 0–6, 0–7 and 0–10 years for early-onset compared with later-onset age groups. Mean ratios of paediatric CD to UC incidence were assessed over time for studies conducted either wholly, or mostly, during the three time periods 1970–1989, 1990–1999 and since 2000.

To compare the incidence of paediatric CD and UC regionally across Europe since 2000, Fisher's Exact test was used to compare the numbers of studies based in the four regions of Europe [east,

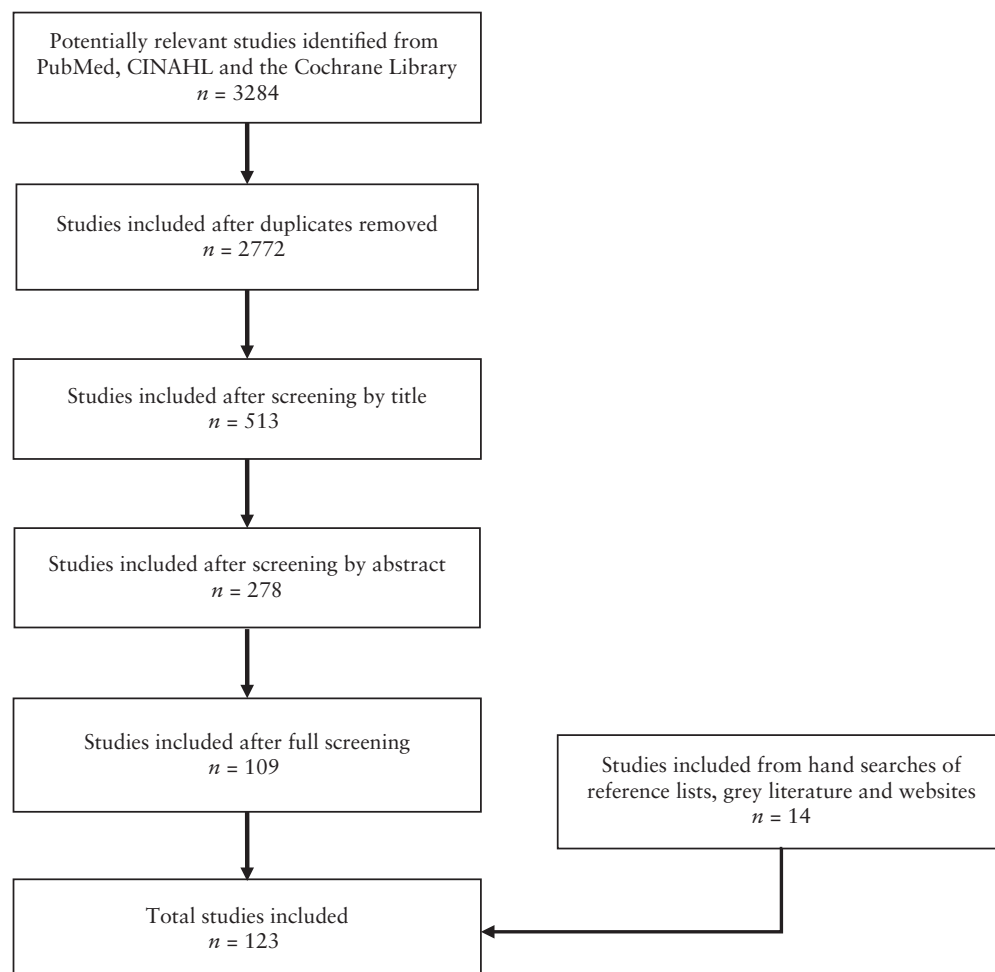

**Figure 1.** PRISMA flow diagram.

west, north and south] that reported high or low incidence rates. High incidence was defined as >3.0 per 100 000 population for paediatric CD and >2.5 per 100 000 for paediatric UC. Incidence and prevalence rates were calculated using the numbers of paediatric IBD cases as numerators and the resident paediatric populations as denominators, and were expressed per 100 000 population. Significance was measured at the conventional 5% level.

### 3. Results

#### 3.1. Geographical coverage of studies across Europe included in the review

The numbers of studies and countries covered under each project objective are summarized for each of the four regions of Europe in [Table 1](#). Most of the evidence is from northern Europe, largely from Denmark, Norway, Scotland and Sweden. Reports from western Europe are from Austria, Belgium, France, Germany, Switzerland and The Netherlands, while in southern Europe, most evidence is from Italy, Slovenia and Spain. Of the four European regions, there is least literature from eastern Europe.

#### 3.2. Incidence of paediatric CD across Europe

[Appendix 2](#) shows incidence and prevalence rates reported for paediatric CD split into two periods, 1970–1999 and 2000–2018. Since 2000, incidence has varied from 0.3 per 100 000 population in the Tuzla region of Bosnia & Herzegovina,<sup>10</sup> to 10 per 100 000 in the Uppsala region of Sweden.<sup>11</sup> Other studies that have reported highest incidence of paediatric CD in recent years refer to Denmark nationally [9.7],<sup>12</sup> four departments of northern France [9.3],<sup>13</sup> Stockholm County, Sweden [9.2],<sup>14</sup> along with Primorsko-Goranska County, Croatia [8 per 100 000],<sup>15</sup> and Veszprem province of Hungary [7.2].<sup>16</sup>

During the earlier period from 1970 to 1999, incidence was usually lower than in recent years, with highest incidence reported from Stockholm County, Sweden [4.9 per 100 000],<sup>17</sup> Iceland nationally [4.5],<sup>18</sup> south Limburg in The Netherlands [4.2],<sup>19</sup> northern France [4.1]<sup>13</sup> and the Faroe Islands [4].<sup>20</sup>

Most studies that have reported high incidence of paediatric CD [>3 per 100 000] are from northern Europe, particularly Scandinavia, and most that have reported low incidence [≤3 per

100 000] are from southern Europe, with the notable exception of Slovenia, or eastern Europe. Since 2000, 17 of 21 studies from northern Europe [81%] reported high incidence, which is greater than three of 12 studies [25%] from southern Europe [ $p = 0.003$ ], but not significantly higher than 56% of nine studies from eastern Europe [ $p = 0.195$ ], or 71% of seven studies from western Europe [ $p = 0.621$ ]. Overall, the proportion of studies reporting high incidence in northern Europe [81%] was higher than for the other three regions of Europe combined [46%;  $p = 0.019$ ].

[Table 2](#) and [Figure 2a](#) illustrate a meta-analysis of paediatric CD incidence reported across Europe since 2000. This shows the highest incidence quintile largely based on studies from parts of Scandinavia [Denmark, Norway and Sweden] Croatia and France, and lowest incidence in studies from southern and eastern Europe [Bosnia & Herzegovina, Italy, Malta, Moldova and Poland].

#### 3.3. Incidence of paediatric UC across Europe

Since 2000, the incidence of paediatric UC has ranged across Europe from no cases reported from Tartu County, Estonia, in 2010,<sup>21</sup> to 9.5 per 100 000 reported from Corsica, France, between 2002 and 2003 [[Appendix 3](#)].<sup>22</sup> Other studies that have reported high incidence of paediatric UC refer to the Uppsala region of Sweden [8.9],<sup>23</sup> Finland nationally [7.7],<sup>24</sup> Denmark nationally [6.7]<sup>12</sup> and the Veszprem province of Hungary [5.2].<sup>16</sup>

Regionally across Europe, the proportion of studies since 2000 that reported a high incidence of paediatric UC [>2.5 per 100 000] was higher in northern Europe [70% of 20 studies] than in southern Europe [27% of 11 studies;  $p = 0.031$ ]. However, it was not significantly higher than in eastern Europe [43% of eight studies;  $p = 0.200$ ] or western Europe [50% of six;  $p = 0.628$ ]. Overall, the proportion of studies that reported high incidence in northern Europe [70%] was higher than for the other three regions of Europe combined [36%;  $p = 0.040$ ]. The meta-analysis in [Table 2](#) and [Figure 2b](#) show the highest incidence quintile of paediatric UC in studies from parts of the four Scandinavian countries and Germany, with lowest incidence in studies from southern and eastern Europe [Bosnia & Herzegovina, Croatia, Estonia, Italy and Spain].

Of 44 studies since 2000 that have reported both paediatric CD and UC incidence, 34 [77%] reported higher incidence for CD. Of

**Table 1.** A summary of the numbers of studies and countries regionally across Europe that are covered for each of the review objectives

| Study objective                                                                                                       | Number of studies [and number of countries covered] |                |                |                 |
|-----------------------------------------------------------------------------------------------------------------------|-----------------------------------------------------|----------------|----------------|-----------------|
|                                                                                                                       | Northern Europe                                     | Western Europe | Eastern Europe | Southern Europe |
| 1a). Incidence or prevalence of paediatric Crohn's disease since 1970                                                 | 65 [10]                                             | 16 [6]         | 11 [5]         | 20 [7]          |
| 1b). Incidence or prevalence of paediatric ulcerative colitis since 1970                                              | 51 [10]                                             | 18 [6]         | 10 [5]         | 18 [7]          |
| 1c). Incidence or prevalence of paediatric indeterminate colitis since 1970                                           | 23 [10]                                             | 7 [3]          | 5 [3]          | 5 [2]           |
| 2a). Regional variation in the incidence of paediatric Crohn's disease since 2000                                     | 21 [9]                                              | 7 [5]          | 9 [5]          | 12 [4]          |
| 2b). Regional variation in the incidence of paediatric ulcerative colitis since 2000                                  | 20 [9]                                              | 6 [4]          | 8 [5]          | 11 [4]          |
| 3a). Trends in the incidence of paediatric Crohn's disease since 1970                                                 | 25 [9]                                              | 2 [1]          | 4 [2]          | 2 [2]           |
| 3b). Trends in the incidence of paediatric ulcerative colitis since 1970                                              | 20 [9]                                              | 2 [1]          | 4 [2]          | 2 [2]           |
| 3c). Trends in the incidence of paediatric Crohn's disease since 1970 according to the age group at disease onset.    | 5 [3]                                               | 1 [1]          | 0 [0]          | 0 [0]           |
| 3d). Trends in the incidence of paediatric ulcerative colitis since 1970 according to the age group at disease onset. | 3 [3]                                               | 1 [1]          | 0 [0]          | 0 [0]           |
| 4). Incidence or prevalence of paediatric IBD since 1970 according to study case ascertainment and design             | 69 [10]                                             | 20 [6]         | 13 [5]         | 20 [7]          |

**Table 2.** The incidence of paediatric Crohn's disease across Europe

| Quintile [and incidence range per 100 000] | Country              | Details of geographical coverage [and approximate population coverage for non-national studies] |       |
|--------------------------------------------|----------------------|-------------------------------------------------------------------------------------------------|-------|
| <b>For Crohn's disease:</b>                |                      |                                                                                                 |       |
| <b>Quintile I</b><br>[<1.3 per 100 000]    | Moldova              | Chisinau city                                                                                   | [20%] |
|                                            | Bosnia & Herzegovina | Tuzla region                                                                                    | [15%] |
|                                            | Malta                | National                                                                                        |       |
|                                            | Italy                | National                                                                                        |       |
|                                            | Poland               | National                                                                                        |       |
| <b>Quintile II</b><br>[1.3–2.3]            | Czech Republic       | 25 centres                                                                                      | [n/k] |
|                                            | Netherlands          | National                                                                                        |       |
|                                            | Iceland              | National                                                                                        |       |
|                                            | Spain                | National, 78 centres                                                                            |       |
|                                            | Ireland              | National                                                                                        |       |
| <b>Quintile III</b><br>[2.4–4.7]           | Northern Ireland     | National                                                                                        |       |
|                                            | England              | National                                                                                        |       |
|                                            | Wales                | National                                                                                        |       |
|                                            | Slovenia             | National                                                                                        |       |
|                                            | Hungary              | National                                                                                        |       |
| <b>Quintile IV</b><br>[4.8–5.9]            | Scotland             | National                                                                                        |       |
|                                            | Austria              | Styria state                                                                                    | [15%] |
|                                            | Germany              | Saxony state and Obepfalz district                                                              | [6%]  |
|                                            | Finland              | National                                                                                        |       |
|                                            | Estonia              | Tartu County                                                                                    | [10%] |
| <b>Quintile V</b><br>[6.0+]                | Norway               | Oslo and Akershus                                                                               | [20%] |
|                                            | France               | Nord, Pas-de-Calais, Somme and Seine Maritime departments                                       | [10%] |
|                                            | Denmark              | National                                                                                        |       |
|                                            | Croatia              | Primorsko-Goranska County                                                                       | [7%]  |
|                                            | Sweden               | Uppsala and Stockholm Counties                                                                  | [25%] |
| <b>For ulcerative colitis:</b>             |                      |                                                                                                 |       |
| <b>Quintile I</b><br>[<1.0 per 100 000]    | Estonia              | Tartu County                                                                                    | [10%] |
|                                            | Bosnia & Herzegovina | Tuzla region                                                                                    | [15%] |
|                                            | Spain                | National, 78 centres                                                                            |       |
|                                            | Croatia              | Primorsko-Goranska County                                                                       | [7%]  |
|                                            | Italy                | National                                                                                        |       |
| <b>Quintile II</b><br>[1.0–1.7]            | Northern Ireland     | National                                                                                        |       |
|                                            | Poland               | National                                                                                        |       |
|                                            | England              | National                                                                                        |       |
|                                            | Netherlands          | National                                                                                        |       |
|                                            | Wales                | National                                                                                        |       |
| <b>Quintile III</b><br>[1.7–2.2]           | Malta                | National                                                                                        |       |
|                                            | Czech Republic       | Pilsen and Moravia regions                                                                      | [35%] |
|                                            | Ireland              | National                                                                                        |       |
|                                            | Scotland             | National                                                                                        |       |
|                                            | Austria              | Styria state                                                                                    | [15%] |
| <b>Quintile IV</b><br>[2.3–3.0]            | Hungary              | National                                                                                        |       |
|                                            | Iceland              | National                                                                                        |       |
|                                            | Moldova              | Chisinau city                                                                                   | [20%] |
|                                            | France               | Nord, Pas-de-Calais, Somme and Seine Maritime departments                                       | [10%] |
|                                            | Slovenia             | National                                                                                        |       |
| <b>Quintile V</b><br>[3.1+]                | Germany              | Saxony state and Obepfalz district                                                              | [6%]  |
|                                            | Norway               | Oslo and Akershus                                                                               | [20%] |
|                                            | Sweden               | Uppsala and Stockholm Counties                                                                  | [25%] |
|                                            | Denmark              | National                                                                                        |       |
|                                            | Finland              | National                                                                                        |       |

the other ten studies, five reported equal or similar [+20%] incidence and the remaining five studies – from France, Finland [two], Italy and the Netherlands – reported higher incidence of UC.

Over time, the mean ratio of paediatric CD to UC incidence has increased significantly from 1.0 (95% confidence interval [CI] = 0.6–1.4) for studies conducted during the 1970s and 1980s to 1.9 [1.5–2.3] for those during the 1990s, but has since fallen slightly to 1.6 [1.3–1.9] for those since 2000.

### 3.4. Incidence of paediatric indeterminate colitis across Europe

The incidence of paediatric indeterminate [or unclassified] colitis, as reported from studies in Europe, has varied from 0 in several studies to 1.5 per 100 000 population reported from the Netherlands nationally between 1999 and 2001,<sup>25</sup> with little clear pattern across Europe [Appendix 4]. The incidence of paediatric indeterminate colitis is often higher in children and adolescents than in adults,



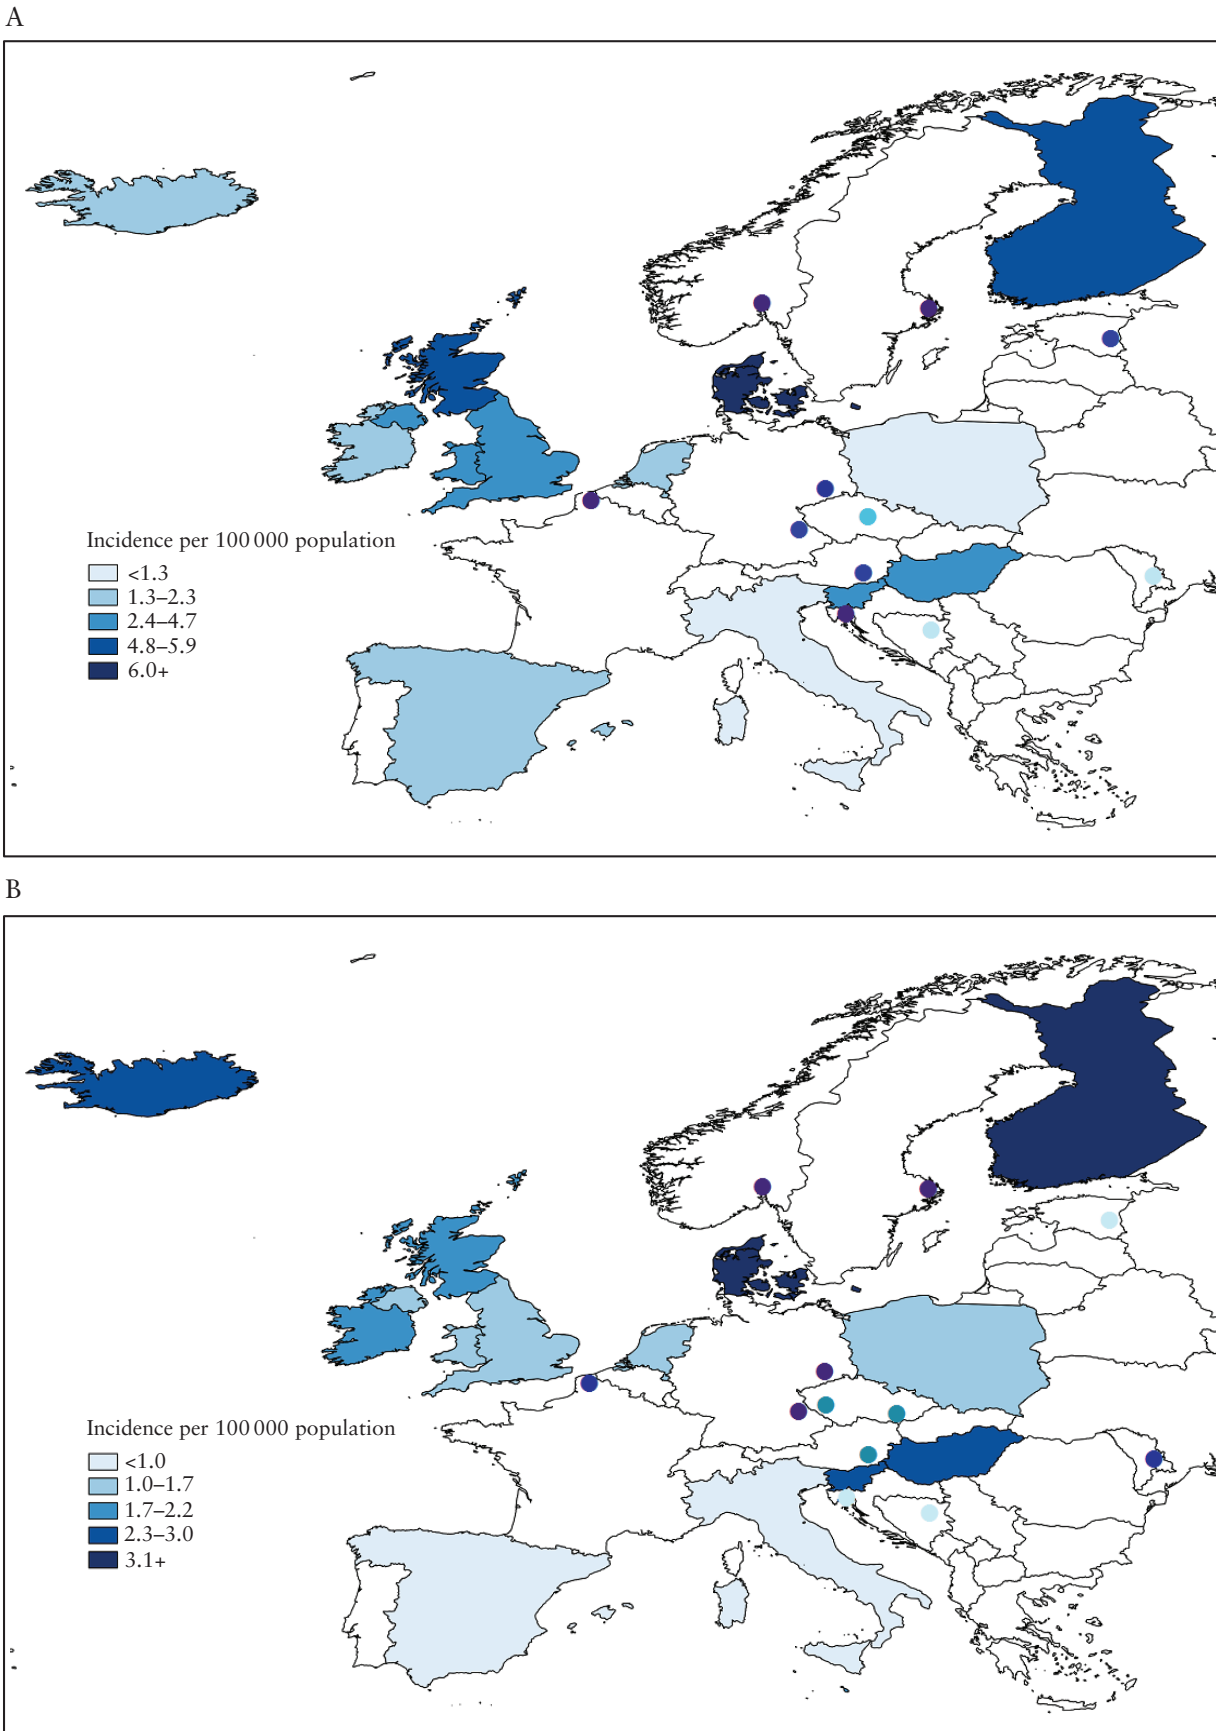

**Figure 2.** The incidence of paediatric Crohn's disease (a) paediatric ulcerative colitis (b) across Europe. The blue circles denote the approximate locations of non-national studies. For further details of these studies, see [Table 2](#).

particularly in studies where disease onset peaks at these ages. Over time, a high proportion of indeterminate colitis cases progress with re-classification to either CD, UC or to other much less common forms of IBD, while symptoms resolve in some cases.

### 3.5. Incidence of paediatric IBD based on restricted age ranges

Two further studies have reported on paediatric IBD incidence for more restricted age ranges: a national study across Ireland from 2000 to 2014 for children aged 0–9 years [incidence of CD, UC and colitis undetermined = 2.5, 2.1 and 0.6 per 100 000 population, respectively]<sup>26</sup>; and a study of CD in Cardiff, Wales, which reported an incidence of 1.7 per 100 000 for children aged 10–14 years.<sup>27</sup>

### 3.6. Prevalence of paediatric IBD across Europe

Relatively few studies have reported on population-based prevalence, seven for CD and five for UC. Reported prevalence for CD has ranged from 8.2 per 100 000 in east Denmark from 1998 to 2000,<sup>28</sup> to approximately 60 per 100 000 nationally across Hungary during 2011–2013.<sup>29</sup> For UC, prevalence has varied from 8.3 per 100 000 in east Denmark from 1998 to 2000,<sup>28</sup> to approximately 30 per 100 000 across Hungary during 2011–2013,<sup>29</sup> nationally across Sweden in 2010,<sup>30</sup> and in Copenhagen County, Denmark, in 1978.<sup>31</sup>

### 3.7. Trends in the incidence of paediatric IBD across Europe

Longitudinal trends in the incidence of paediatric CD since 1970 have been reported from 33 studies, largely from northern Europe [25; Figure 3a] but also from eastern [four], western and southern Europe [two each; Figure 3b]. All but three studies [91%] show increases over time. The largest increases are evident from Stockholm County and Stockholm during the 1990s [mean annual increases = 22% and 39% respectively],<sup>17,32</sup> south Glamorgan, Wales, during the late 1980s [28% increase],<sup>33</sup> the Wessex Region of England from 2005 to 2010 [11%],<sup>34</sup> the Pilsen region of the Czech Republic from 2000 to 2015 [8.9%],<sup>35</sup> Denmark nationally from 1997 to 2012 [7.3%],<sup>12</sup> and west Hungary [increase from 0 to 7.2 per 100 000 population between 1979 and 2009].<sup>36</sup>

In total, 29 studies have reported on trends over time in paediatric UC incidence, mostly from northern Europe [21; Figure 4a] and also from eastern [four], western and southern Europe [two each; Figure 4b]. Twenty-one of the 29 studies [75%] reported increases over time, four reported reductions in incidence and four reported no trend. The largest increases were from the Czech Republic, 25 centres [average 33% per annum increase from 1991 to 2001],<sup>37</sup> Dublin, Ireland [29% increase], from 2000 to 2010,<sup>38</sup> and Stockholm County, Sweden [28%], from 2002 to 2007,<sup>14</sup> and from west Hungary [21.4%] between 1979 and 2009.<sup>36</sup>

When confining the analysis to the nine national studies that have reported on longitudinal trends of CD [Figure 5a], all show overall increases, although the increases were larger during the earlier study years in three studies, from Finland, Iceland and Scotland. Of the seven national studies of trends in paediatric UC [Figure 5b], all showed overall increases in incidence, although in four cases (Denmark [two], Finland and Iceland), earlier increases in incidence levelled off in more recent years.

### 3.8. Trends in incidence according to age group at disease onset

Several studies have reported on trends in incidence for paediatric CD and/or UC according to the age group of the child or adolescent

[e.g. very early onset vs later adolescent onset; Figure 6]. With the exception of a study of UC from south-east Norway,<sup>39</sup> this evidence shows more clear increases in incidence – and much higher incidence rates – among adolescent ages rather than among infants and younger children.

### 3.9. Case ascertainment and study design

Most of the evidence on paediatric IBD incidence and prevalence has been based on individual studies that have used varying study design methodologies and information sources. These are detailed in Appendices 2–4 for CD, UC and indeterminate colitis respectively. Most studies were based on records from gastroenterology, paediatric and pathology departments, while few incorporated primary care data.

There have been few multinational studies that have used the same case definitions, information sources and timescales. A notable exception is the EPICOM inception cohort for IBD in centres across Europe. The cohort was based on standardized and consistent diagnostic criteria, time periods of inclusion and ascertainment methods across each centre. It included paediatric as well as adult IBD and, with sufficient numbers of paediatric IBD cases to fulfil the study inclusion and exclusion criteria, it was used to provide incidence data for several countries in this report.<sup>21,40</sup>

## 4. Discussion

This study provides a first systematic review of IBD incidence and prevalence focused on all 51 European countries. It has found higher incidence of paediatric IBD in northern Europe than in other European regions, with a stronger north–south gradient than an east–west gradient [from higher to lower]. It has also identified large increases in the incidence of both paediatric CD and UC over the last 50 years, which are widespread across Europe. The incidence of paediatric CD has increased up to 9 or 10 per 100 000 population in parts of Europe, including Scandinavia, while rates for paediatric UC are often slightly lower than for CD. Studies that have reported on trends in paediatric IBD incidence according to age group at disease onset have tended to report sharper increases, as well as much higher incidence, among older age groups rather than for younger children.

### 4.1. Strengths and limitations

The strengths of this systematic review and meta-analysis include its geographical breadth across 51 European countries. The study sought to address possible publication biases by searching grey literature and hand searching reference lists. The main limitations of the information sources are first that incidence and prevalence data are not compiled routinely. The strongest evidence is obtained from prospective multinational studies that use consistent clinical definitions and methodology across centres or from large IBD disease registers with established case ascertainment techniques, but these are not in place in most countries. Much of the evidence compiled and used in the meta-analyses is therefore drawn from individual studies in single or networked centres. These centres are often based in large cities and the subjects included may not be representative of their wider national populations, so that their incidence rates may also not be representative of their national populations. For example, several studies have shown that the incidence of paediatric IBD is higher in urban than in rural settings.<sup>41,42</sup>

There is variation in healthcare systems and methodology used across the many different studies, in terms of the diagnostic criteria used, the age ranges of the subjects classified as paediatric and

A

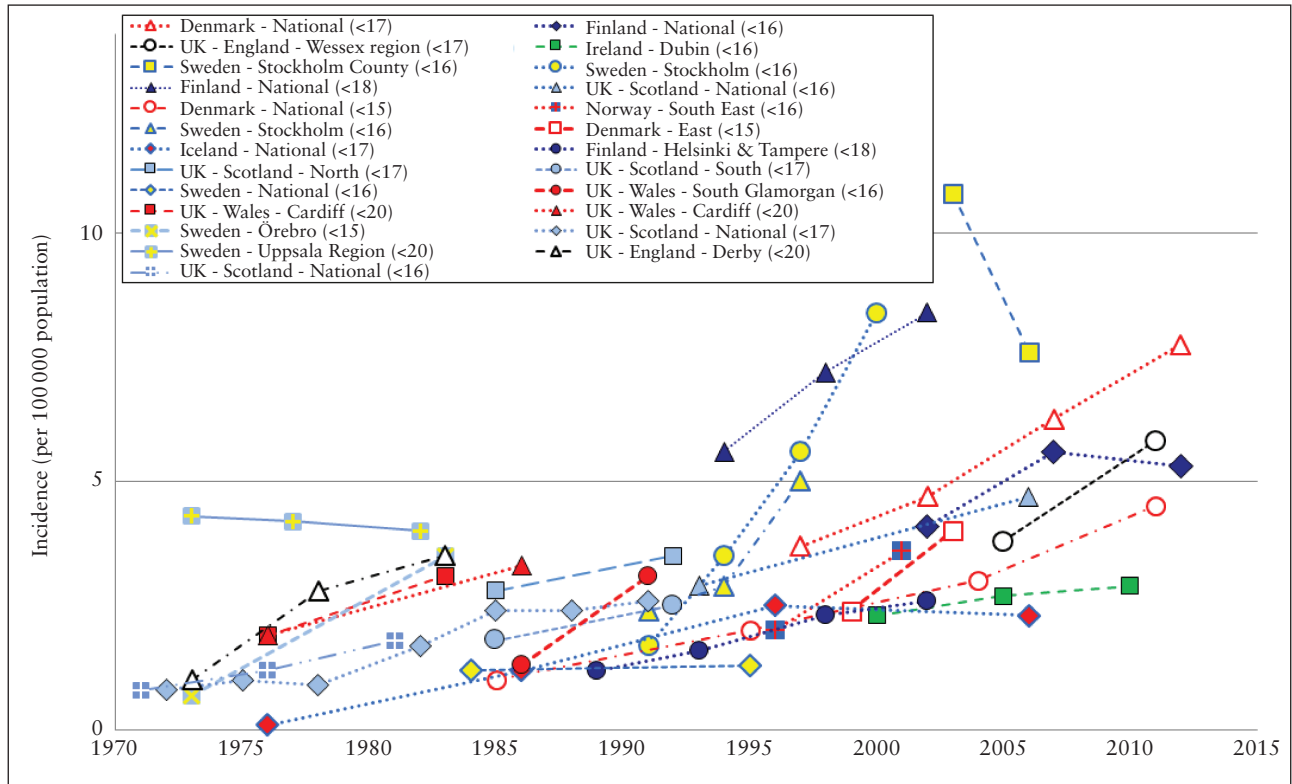

B

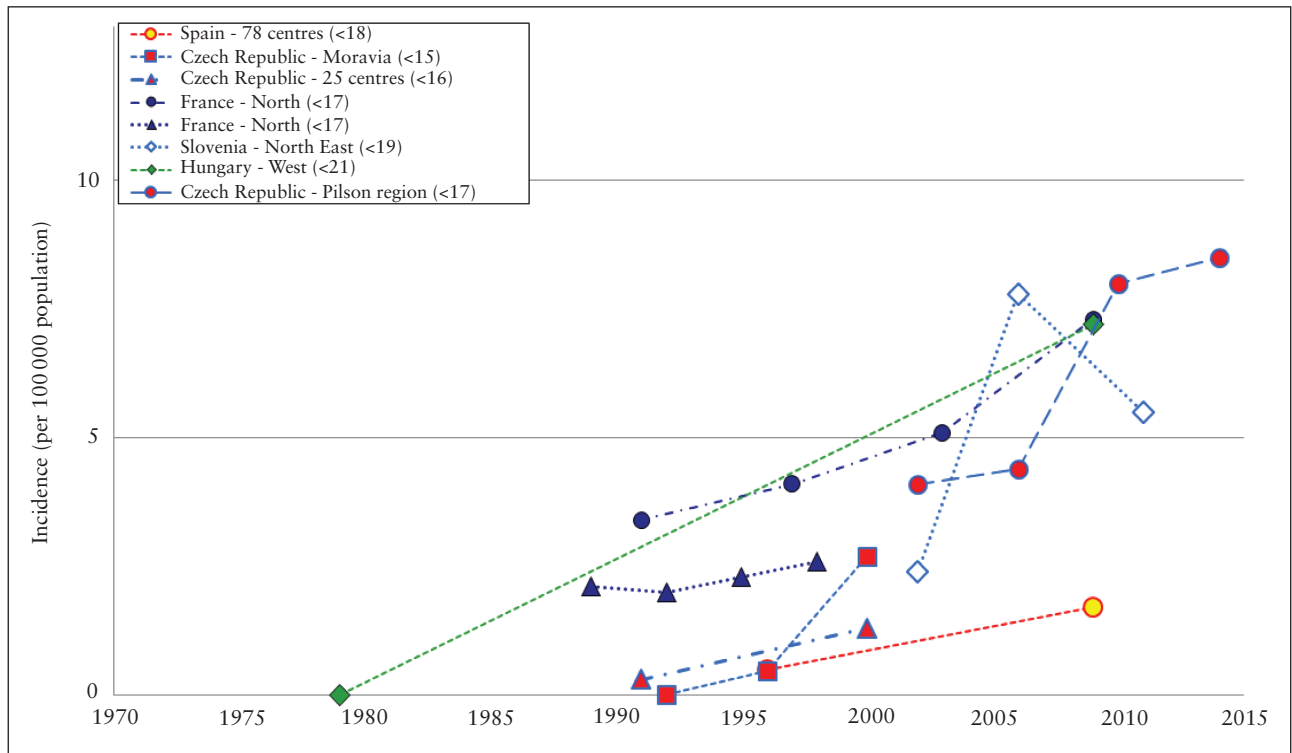

**Figure 3.** Trends in the incidence of paediatric Crohn's disease in Northern Europe (a) and in Western, Southern and Eastern Europe (b) since 1970. Patient age ranges [in years] are denoted in parentheses. References for the studies are provided in [Appendix 2](#).



A

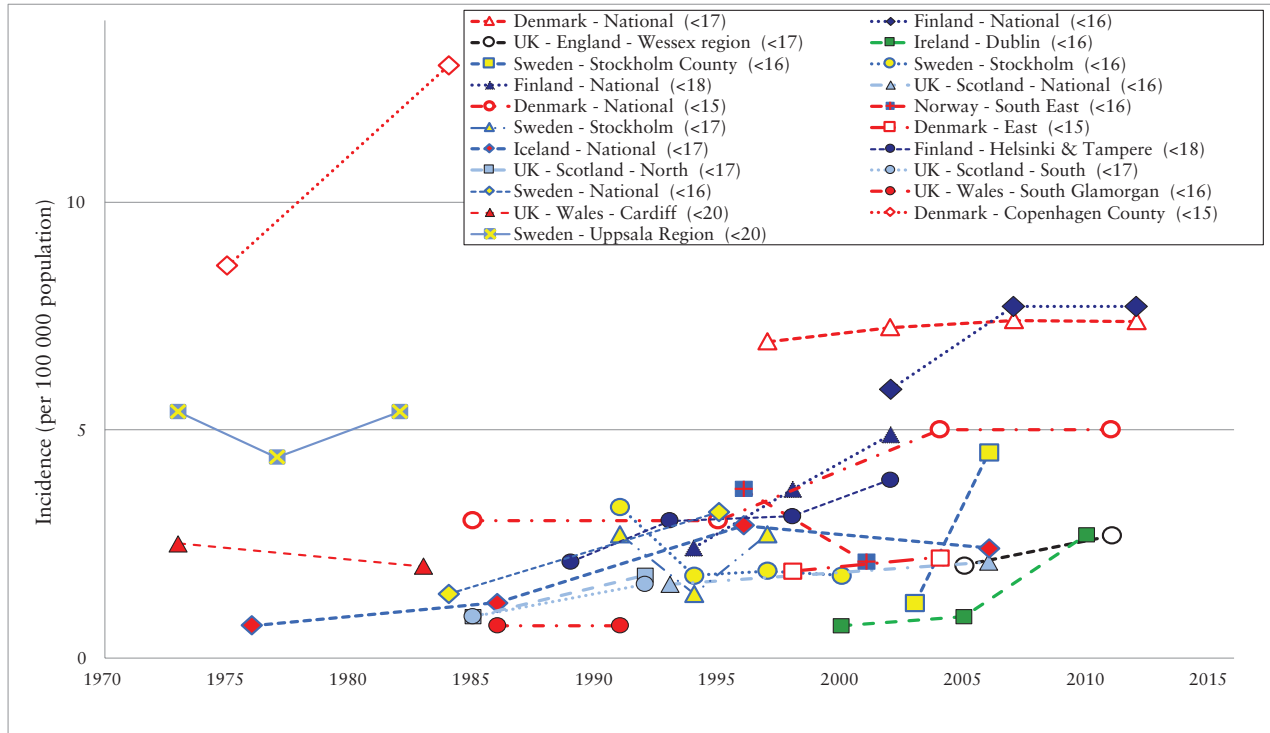

B

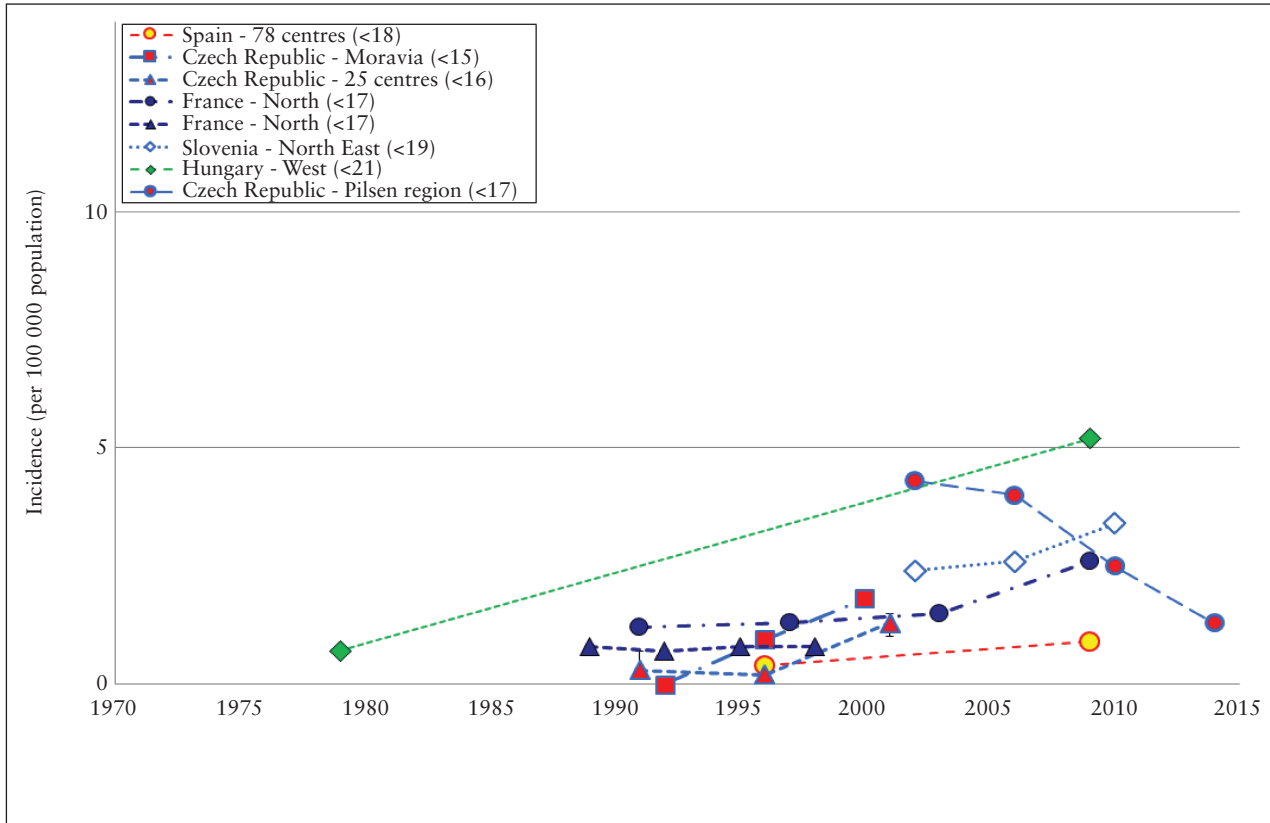

Figure 4. Trends in the incidence of paediatric ulcerative colitis in Northern Europe (a) and in Western, Southern and Eastern Europe (b) since 1970. Patient age ranges [in years] are denoted in parentheses. References for the studies are provided in Appendix 3.

A

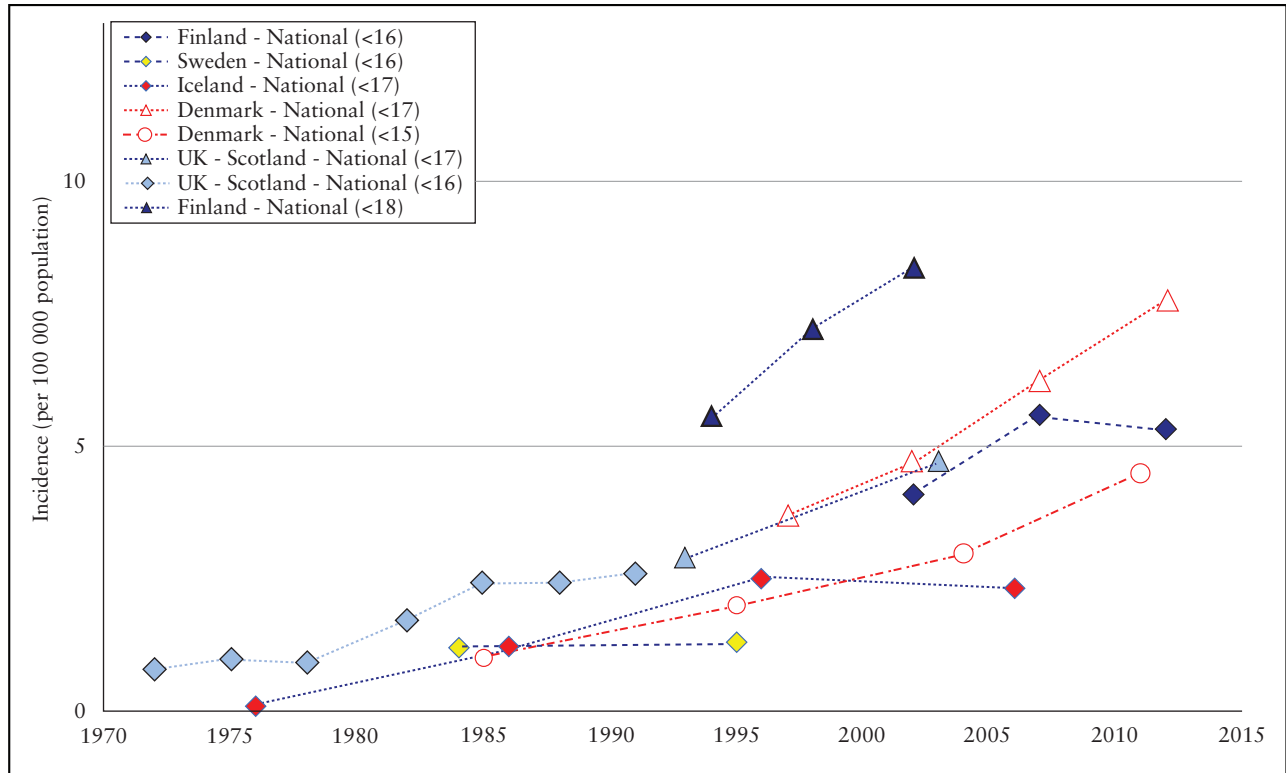

B

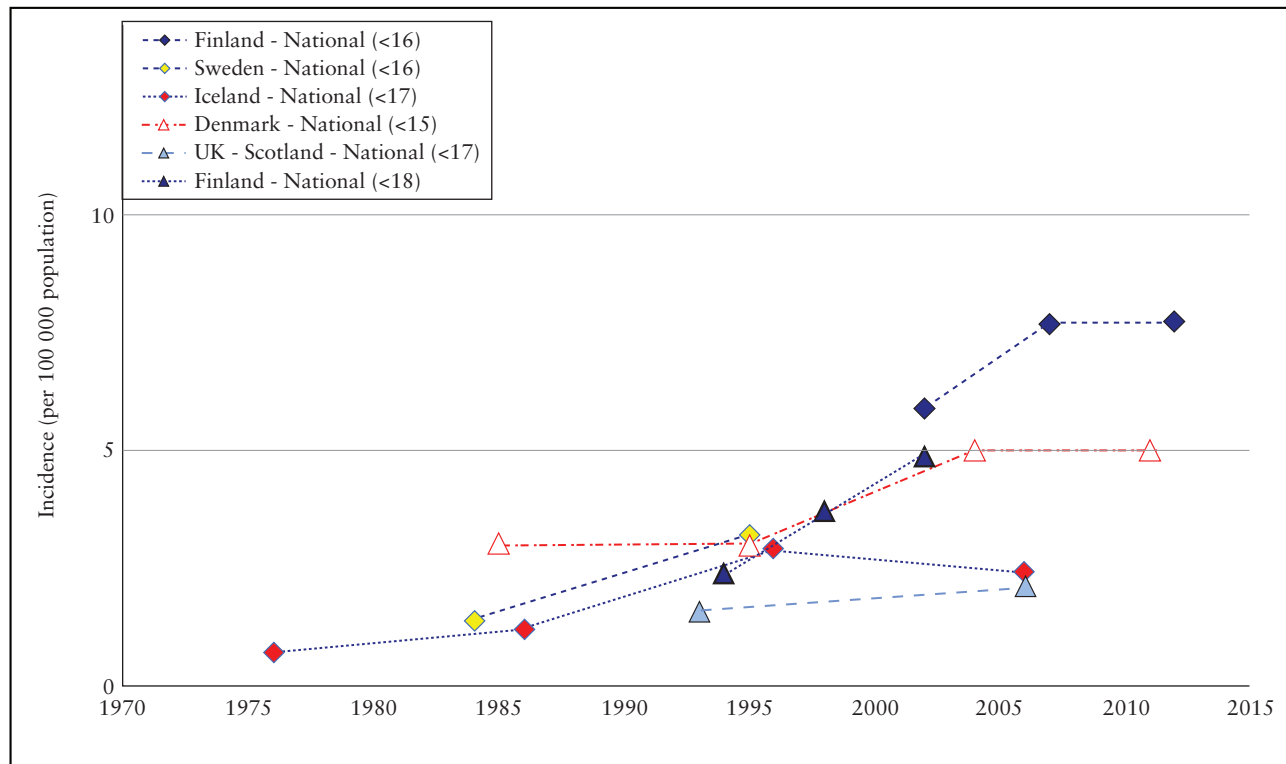

**Figure 5.** Trends in the incidence of paediatric Crohn's disease (a) and paediatric ulcerative colitis (b) across Europe since 1970, based on national studies. Patient age ranges [in years] are denoted in parentheses. References for the studies are provided in Appendices 2 and 3.

A

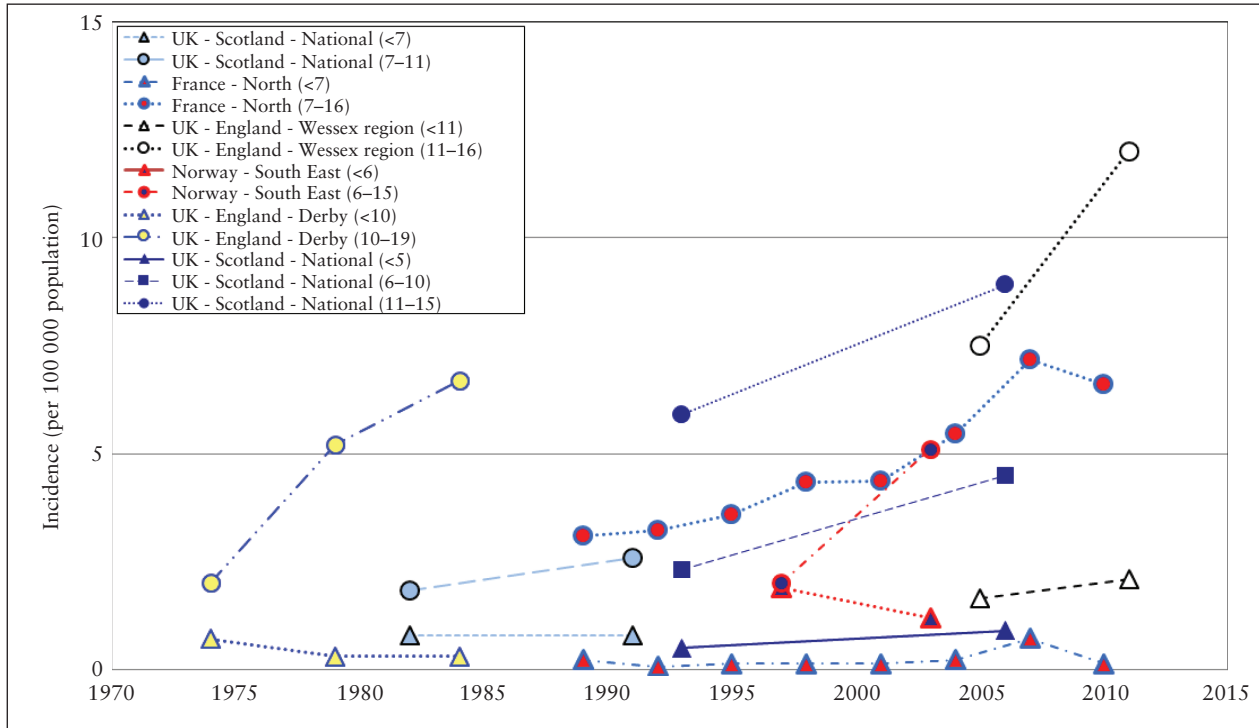

B

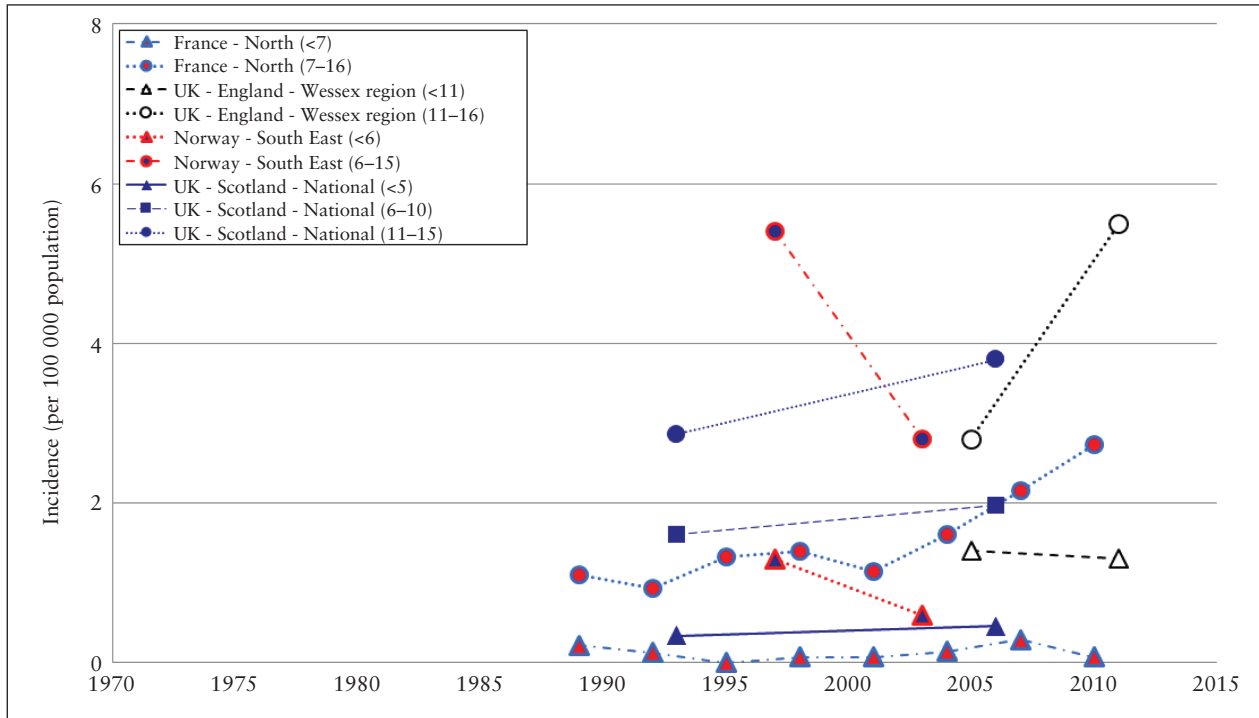

**Figure 6.** Trends in the incidence of paediatric Crohn's disease (a) and of paediatric ulcerative colitis (b) across Europe since 1970, by age group at disease onset. Patient age ranges [in years] are denoted in parentheses. References for the studies are provided in Appendices 2 and 3.

adolescent, the information sources and case ascertainment used, and also whether the studies used case validation to confirm diagnoses. There have been improvements over time in clinical diagnostic techniques for paediatric IBD which may have led some studies to

note increases over time in mild cases that may not have been detected in earlier decades. Hence, this could affect the trends in IBD incidence reported in some studies, especially during earlier decades, as well as comparisons of incidence across studies.

Most of the evidence on paediatric IBD incidence in this review has been reported from northern Europe with relatively few studies from eastern Europe or southern Europe outside Italy and Spain. The highest incidence has been reported in studies from Scandinavia along with northern France, which are some of the areas that have been studied most intensively. The higher incidence compared with studies in less investigated regions may therefore partly reflect better developed or established case detection methods. In the meta-analysis of incidence across European countries, although precedence was given to national studies, rates for some countries were still confined to regional studies, so that the maps presented show countries shaded only when based on national studies. The meta-analysis would also be affected by variation in country population sizes. In this analysis, there was variation across non-national studies in the proportions of the national populations covered, which have been specified in the notes to the maps. Also, in the analysis of incidence according to the age at disease onset, relatively few studies provided this information, so that the available evidence is limited.

## 4.2. Regional variation in incidence

Although most evidence was available from northern Europe, for both paediatric CD and UC, we found much stronger evidence of a north–south than an east–west gradient in the incidence of paediatric IBD, with highest rates often in Scandinavia. For adult IBD there is both a strong east–west as well as a north–south gradient in incidence, with highest rates usually in northern or western regions of Europe.<sup>43</sup> The lesser east–west gradient for paediatric IBD review may be partly due to the smaller evidence base than for adult IBD, its focus on northern Europe, and the lack of paediatric studies from many eastern and southern European countries. Nonetheless, the higher incidence in more affluent regions of northern and western Europe is consistent with several studies that have linked paediatric IBD with higher socioeconomic groups.<sup>44–46</sup>

## 4.3. Trends in incidence

There have been large increases over time in the incidence of both paediatric CD and UC. Although most of this evidence is from northern Europe, the increases appear widespread throughout Europe, including both more affluent and lesser developed regions of Europe. For example, the largest increases have been reported in studies from countries such as Sweden, Denmark, Hungary, the Czech Republic, Wales and Ireland. The increases in incidence in eastern European countries may be partly explained by increasing adoption over time of westernized diets. The incidence of paediatric CD has now reached 9 or 10 per 100 000 in some European regions, especially in Scandinavia, while that for paediatric UC is often slightly lower than for CD. Outside Europe the highest incidence has been reported from north America and Australasia.<sup>2,47,48</sup>

The increases in incidence are still apparent when the analysis of trends was confined to national studies. The increases are also slightly stronger for paediatric CD than for UC, particularly in more recent years when incidence has levelled off after earlier increases. The latter may reflect improvements over time in diagnostic testing in some studies during earlier decades. However, in the absence of major background changes in population genetic factors, the large increases in incidence would indicate the role of environmental factors in the pathogenesis of IBD. Over time, there was also a significant increase in the ratio of paediatric CD to UC incidence, although this has fallen slightly during the most recent study years. The increase is likely to reflect higher rates of upper gastrointestinal

endoscopies over time and consequent reductions in the misclassification of CD cases.<sup>49–52</sup> It may also reflect more widespread diets high in saturated fat or ‘junk food’ diets, which are thought to be an evolving environmental trigger in the pathogenesis of IBD and Crohn’s disease in particular.<sup>53–56</sup>

## 4.4. Trends in incidence according to age at disease onset

Studies that have reported on trends in incidence according to the age group at disease onset, show larger increases – as well as higher incidence – among older age groups than among infants and younger children, especially for CD. Although the incidence of paediatric IBD often increased sharply with age up to 19 and 20 years, many of the studies that reported highest incidence of were confined to the 0–14 or 0–15 year age groups, for example from Scandinavia<sup>11,12,14,24</sup> and northern France.<sup>13</sup> Studies worldwide have shown that the incidences of both early- and very early-onset IBD have been increasing over time, particularly in the most recent years, as the genetic contribution to IBD has become better understood.<sup>47,57,58</sup>

## 4.5. Prevalence

Few studies have reported on the prevalence of paediatric IBD in Europe, and reported rates vary widely across studies. The variation is probably explained at least partly by differences in study methodology, particularly differences in study time periods and case ascertainment for establishing prevalence.

Paediatric IBD is frequently a devastating chronic disease, with incidence rates that are constantly increasing in most countries and often presents societal challenges. The identification of high-risk populations can help with identifying preferential targeting for studies that focus on detecting environmental triggers as an important step towards primary prevention strategies.

## 4.6. Recommendations

- There is a need for more prospective studies, preferably multinational and based on IBD registries, that use standardized definitions, methodology and timescales. This would enable better comparisons of paediatric IBD disease patterns across European countries and across regions within countries. Specialist clinical information systems should be valuable for facilitating standardized clinical definitions in prospective studies.
- In view of the increases in incidence and prevalence of paediatric IBD, greater resources should be provided to enable more subspecialty paediatric gastrointestinal training to improve the management of IBD in childhood. Long-term and gradual transitional arrangements between paediatric care and adult care should be a key part of the care pathway to ensure the most effective and least disruptive long-term disease management.
- Improved education and workplace policies that better consider the needs of paediatric IBD patients and parents and carers of children with IBD should be implemented.
- Children with IBD must be treated by a multidisciplinary team looking not only at the medical aspects but also at areas related to the patient’s life, such as lifestyle, diet, and social and psychological needs.
- Future studies should seek to incorporate increasingly available electronic hospital clinic and primary care data, which could also help facilitate better understanding of the effects of therapeutic interventions. Although several registries are currently in place in

Europe,<sup>21,59–65</sup> a major pan-European registry of paediatric IBD would greatly improve our ability to identify and monitor paediatric IBD across Europe. This would require changes in medical policies in some countries with mandatory reporting of IBD cases.

## Funding

This work was supported by The European Society for Paediatric Gastroenterology Hepatology and Nutrition.

## Conflict of Interest

N.T. has participated as a consultant and/or speaker for Nutricia and Danone. E.M. has received research support from Nestlé Italiana and Nutricia Italia, honorarium for lectures from Ferring and served as a member of the advisory board from Abbvie. R.O. has received personal fees for lectures from Abbvie, Ewopharma, Sandoz, Nutricia, Medis and Amgen. All other authors declare no conflicts of interest.

## Acknowledgments

We thank Elen Davies, Swansea University Information Services and Systems, for advice and help with systematic review searches and methods; Judy Williams, Medical School, Swansea University, for help with references; and Lynne Tithecott, Caroline Rauter, Jane Pressdee and Rose Williams, Swansea University Document Supply Services, for obtaining literature. We also acknowledge the support of Prince Abdullah Ben Khalid Celiac Research Chair, College of Medicine, Vice-Deanship of the Research Chairs, King Saud University, Riyadh, Saudi Arabia.

## Author Contributions

S.E.R. and J.G.W. designed the study with N.T. and I.B.; S.E.R., K.T. and S.M.R. conducted the systematic review and analyses; S.M.R. provided the geographical mapping; A.J. provided advice on systematic review methods; S.E.R. wrote the first drafts of the paper; S.E.R., J.G.W., N.T., I.B., A.J., S.M.R., K.T., M.A.B., J.D., E.M., E.M., R.O., C.P., C.R-K., M.T. and C.T. interpreted the study findings and edited or contributed to subsequent drafts.

## References

- Loftus EV Jr. Clinical epidemiology of inflammatory bowel disease: Incidence, prevalence, and environmental influences. *Gastroenterology* 2004;**126**:1504–17.
- Benchimol EI, Fortinsky KJ, Gozdyra P, Van den Heuvel M, Van Limbergen J, Griffiths AM. Epidemiology of pediatric inflammatory bowel disease: a systematic review of international trends. *Inflamm Bowel Dis* 2011;**17**:423–39.
- Gasparetto M, Guariso G. Highlights in IBD epidemiology and its natural history in the paediatric age. *Gastroenterol Res Pract* 2013;**2013**:829040.
- Malmberg P, Hildebrand H. The emerging global epidemic of paediatric inflammatory bowel disease—causes and consequences. *J Intern Med* 2016;**279**:241–58.
- Farthing M, Roberts SE, Samuel DG, et al. Survey of digestive health across Europe: Final report. Part 1: The burden of gastrointestinal diseases and the organisation and delivery of gastroenterology services across Europe. *United European Gastroenterol J* 2014;**2**:539–43.
- Müller EK, Lakatos LP, Papp M, Veres G. Incidence and Paris classification of pediatric inflammatory bowel disease. *Gastroenterol Res Pract* 2014;**2014**: 904307.
- Fumery M, Duricova D, Gower-Rousseau C, Anness V, Peyrin-Biroulet L, Lakatos PL. Review article: The natural history of paediatric-onset ulcerative colitis in population-based studies. *Aliment Pharmacol Ther* 2016;**43**:346–55.
- von Elm E, Altman DG, Egger M, Pocock SJ, Gøtzsche PC, Vandenbroucke JP; STROBE Initiative. The Strengthening the Reporting of Observational Studies in Epidemiology (STROBE) statement: guidelines for reporting observational studies. *Lancet* 2007;**370**:1453–7.
- QGIS Development Team. *QGIS Geographic Information System. Open Source Geospatial Foundation* [<http://qgis.osgeo.org>]. 2009.
- Pavlovic-Calic N, Salkic NN, Gegic A, Smajic M, Alibegovic E. Crohn's disease in Tuzla region of Bosnia and Herzegovina: a 12-year study (1995–2006). *Int J Colorectal Dis* 2008;**23**:957–64.
- Sjöberg D, Holmström T, Larsson M, et al. Incidence and clinical course of Crohn's disease during the first year - results from the IBD Cohort of the Uppsala Region (ICURE) of Sweden 2005–2009. *J Crohns Colitis* 2014;**8**:215–22.
- Larsen MD, Baldal ME, Nielsen RG, Nielsen J, Lund K, Nørgård BM. The incidence of Crohn's disease and ulcerative colitis since 1995 in Danish children and adolescents <17 years – based on nationwide registry data. *Scand J Gastroenterol* 2016;**51**:1100–5.
- Bequet E, Sarter H, Fumery M, et al.; EPIMAD Group. Incidence and phenotype at diagnosis of very-early-onset compared with later-onset paediatric inflammatory bowel disease: a population-based study [1988–2011]. *J Crohns Colitis* 2017;**11**:519–26.
- Malmberg P, Grahnquist L, Lindholm J, Montgomery S, Hildebrand H. Increasing incidence of paediatric inflammatory bowel disease in northern Stockholm County, 2002–2007. *J Pediatr Gastroenterol Nutr* 2013;**57**:29–34.
- Sincić BM, Vucelić B, Persić M, et al. Incidence of inflammatory bowel disease in Primorsko-goranska County, Croatia, 2000–2004: a prospective population-based study. *Scand J Gastroenterol* 2006;**41**:437–44.
- Lovasz BD, Lakatos L, Horvath A, et al. Incidence rates and disease course of paediatric inflammatory bowel diseases in Western Hungary between 1977 and 2011. *Dig Liver Dis* 2014;**46**:405–11.
- Hildebrand H, Finkel Y, Grahnquist L, Lindholm J, Ekbohm A, Askling J. Changing pattern of paediatric inflammatory bowel disease in northern Stockholm 1990–2001. *Gut* 2003;**52**:1432–4.
- Björnsson S, Jóhannsson JH. Inflammatory bowel disease in Iceland, 1990–1994: a prospective, nationwide, epidemiological study. *Eur J Gastroenterol Hepatol* 2000;**12**:31–8.
- Romberg-Camps MJ, Dagnelie PC, Kester AD, et al. Influence of phenotype at diagnosis and of other potential prognostic factors on the course of inflammatory bowel disease. *Am J Gastroenterol* 2009;**104**:371–83.
- Berner J, Kiaer T. Ulcerative colitis and Crohn's disease on the Faroe Islands 1964–83. A retrospective epidemiological survey. *Scand J Gastroenterol* 1986;**21**:188–92.
- Burisch J. Crohn's disease and ulcerative colitis. Occurrence, course and prognosis during the first year of disease in a European population-based inception cohort. *Dan Med J* 2014;**61**:B4778.
- Abakar-Mahamat A, Filippi J, Pradier C, Dozol A, Hébuterne X. Incidence of inflammatory bowel disease in Corsica from 2002 to 2003. *Gastroenterol Clin Biol* 2007;**31**:1098–103.
- Sjöberg D, Holmström T, Larsson M, et al. Incidence and natural history of ulcerative colitis in the Uppsala Region of Sweden 2005–2009 – results from the IBD cohort of the Uppsala Region [ICURE]. *J Crohns Colitis* 2013;**7**:e351–7.
- Virta LJ, Saarinen MM, Kolho KL. Inflammatory bowel disease incidence is on the continuous rise among all paediatric patients except for the very young: a nationwide registry-based study on 28-year follow-up. *J Crohns Colitis* 2017;**11**:150–6.
- van der Zaag-Loonen HJ, Casparie M, Taminiau JA, Escher JC, Pereira RR, Derkx HH. The incidence of pediatric inflammatory bowel disease in the Netherlands: 1999–2001. *J Pediatr Gastroenterol Nutr* 2004;**38**:302–7.
- Coughlan A, Wylde R, Lafferty L, et al.; DOCHAS Study. A rising incidence and poorer male outcomes characterise early onset paediatric inflammatory bowel disease. *Aliment Pharmacol Ther* 2017;**45**:1534–41.
- Mayberry J, Rhodes J, Hughes LE. Incidence of Crohn's disease in Cardiff between 1934–1977. *Gut* 1979;**20**:602–8.



28. Jakobsen C, Wewer V, Urne F, et al. Incidence of ulcerative colitis and Crohn's disease in Danish children: Still rising or levelling out? *J Crohns Colitis* 2008;2:152–7.
29. Kurti Z, Vegh Z, Golovics PA, et al. Nationwide prevalence and drug treatment practices of inflammatory bowel diseases in Hungary: A population-based study based on the National Health Insurance Fund database. *Dig Liver Dis* 2016;48:1302–7.
30. Ludvigsson JF, Büsch K, Olén O, et al. Prevalence of paediatric inflammatory bowel disease in Sweden: a nationwide population-based register study. *BMC Gastroenterol* 2017;17:23.
31. Binder V, Both H, Hansen PK, Hendriksen C, Kreiner S, Torp-Pedersen K. Incidence and prevalence of ulcerative colitis and Crohn's disease in the County of Copenhagen, 1962 to 1978. *Gastroenterology* 1982;83:563–8.
32. Askling J, Grahnquist L, Ekblom A, Finkel Y. Incidence of paediatric Crohn's disease in Stockholm, Sweden. *Lancet* 1999;354:1179.
33. Cosgrove M, Al-Atia RF, Jenkins HR. The epidemiology of paediatric inflammatory bowel disease. *Arch Dis Child* 1996;74:460–1.
34. Ashton JJ, Wiskin AE, Ennis S, Batra A, Afzal NA, Beattie RM. Rising incidence of paediatric inflammatory bowel disease (PIBD) in Wessex, Southern England. *Arch Dis Child* 2014;99:659–64.
35. Schwarz J, Šykora J, Čvalínová D, et al. Inflammatory bowel disease incidence in Czech children: A regional prospective study, 2000–2015. *World J Gastroenterol* 2017;23:4090–101.
36. Lakatos L, Mester G, Erdelyi Z, et al. Striking elevation in incidence and prevalence of inflammatory bowel disease in a province of western Hungary between 1977–2001. *World J Gastroenterol* 2004;10:404–9.
37. Pozler O, Maly J, Bonova O, et al. Incidence of Crohn disease in the Czech Republic in the years 1990 to 2001 and assessment of pediatric population with inflammatory bowel disease. *J Pediatr Gastroenterol Nutr* 2006;42:186–9.
38. Hope B, Shahdadpuri R, Dunne C, et al. Rapid rise in incidence of Irish paediatric inflammatory bowel disease. *Arch Dis Child* 2012;97:590–4.
39. Perminow G, Frigessi A, Rydning A, Nakstad B, Vatn MH. Incidence and clinical presentation of IBD in children: comparison between prospective and retrospective data in a selected Norwegian population. *Scand J Gastroenterol* 2006;41:1433–9.
40. Fernández A, Hernández V, Martínez-Ares D, et al.; EpiCom Group. Incidence and phenotype at diagnosis of inflammatory bowel disease. Results in Spain of the EpiCom study. *Gastroenterol Hepatol* 2015;38:534–40.
41. Benchimol EI, Kaplan GG, Otley AR, et al. Rural and urban residence during early life is associated with risk of inflammatory bowel disease: a population-based inception and birth cohort study. *Am J Gastroenterol* 2017;112:1412–22.
42. Phavichitr N, Cameron DJ, Catto-Smith AG. Increasing incidence of Crohn's disease in Victorian children. *J Gastroenterol Hepatol* 2003;18:329–32.
43. Burisch J, Pedersen N, Čuković-Čavka S, et al.; EpiCom-group. East–West gradient in the incidence of inflammatory bowel disease in Europe: the ECCO-EpiCom inception cohort. *Gut* 2014;63:588–97.
44. Armitage EL, Aldhous MC, Anderson N, et al. Incidence of juvenile-onset Crohn's disease in Scotland: association with northern latitude and affluence. *Gastroenterology* 2004;127:1051–7.
45. Strisciunglio C, Giugliano F, Martinelli M, et al. Impact of environmental and familial factors in a cohort of pediatric patients with inflammatory bowel disease. *J Pediatr Gastroenterol Nutr* 2017;64:569–74.
46. Kronman MP, Zaooutis TE, Haynes K, Feng R, Coffin SE. Antibiotic exposure and IBD development among children: a population-based cohort study. *Pediatrics* 2012;130:e794–803.
47. Benchimol EI, Guttman A, Griffiths AM, et al. Increasing incidence of paediatric inflammatory bowel disease in Ontario, Canada: evidence from health administrative data. *Gut* 2009;58:1490–7.
48. Ng SC, Bernstein CN, Vatn MH, et al.; Epidemiology and Natural History Task Force of the International Organization of Inflammatory Bowel Disease (IOIBD). Geographical variability and environmental risk factors in inflammatory bowel disease. *Gut* 2013;62:630–49.
49. Kovacs M, Muller KE, Arato A, et al.; Hungarian IBD Registry Group (HUPIR). Diagnostic yield of upper endoscopy in paediatric patients with Crohn's disease and ulcerative colitis. Subanalysis of the HUPIR registry. *J Crohns Colitis* 2012;6:86–94.
50. Hummel TZ, ten Kate FJ, Reitsma JB, Benninga MA, Kindermann A. Additional value of upper GI tract endoscopy in the diagnostic assessment of childhood IBD. *J Pediatr Gastroenterol Nutr* 2012;54:753–7.
51. de Bie CI, Buderus S, Sandhu BK, et al.; EUROKIDS Porto IBD Working Group of ESPGHAN. Diagnostic workup of paediatric patients with inflammatory bowel disease in Europe: results of a 5-year audit of the EUROKIDS registry. *J Pediatr Gastroenterol Nutr* 2012;54:374–80.
52. Buderus S, Scholz D, Behrens R, et al.; CEDATA-GPGE Study Group. Inflammatory bowel disease in pediatric patients: Characteristics of newly diagnosed patients from the CEDATA-GPGE Registry. *Dtsch Arztebl Int* 2015;112:121–7.
53. Hou JK, Abraham B, El-Serag H. Dietary intake and risk of developing inflammatory bowel disease: a systematic review of the literature. *Am J Gastroenterol* 2011;106:563–73.
54. Levine A, Wine E. Effects of enteral nutrition on Crohn's disease: clues to the impact of diet on disease pathogenesis. *Inflamm Bowel Dis* 2013;19:1322–9.
55. Knight-Sepulveda K, Kais S, Santaolalla R, Abreu MT. Diet and inflammatory bowel disease. *Gastroenterol Hepatol (N Y)* 2015;11:511–20.
56. Levine A, Sigall Boneh R, Wine E. Evolving role of diet in the pathogenesis and treatment of inflammatory bowel diseases. *Gut* 2018;67:1726–38.
57. Ashton JJ, Ennis S, Beattie RM. Early-onset paediatric inflammatory bowel disease. *Lancet Child Adolesc Health* 2017;1:147–58.
58. Crowley E, Muise A. Inflammatory bowel disease: what very early onset disease teaches us. *Gastroenterol Clin North Am* 2018;47:755–72.
59. Burisch J, Gisbert JP, Siegmund B, et al. Validation of the 'United Registries for Clinical Assessment and Research' [UR-CARE], a European online registry for clinical care and research in inflammatory bowel disease. *J Crohns Colitis* 2018;12:532–7.
60. The Paediatric IBD Porto Group of the European Society of Pediatric Gastroenterology Hepatology and Nutrition (ESPGHAN). The EUROKIDS Registry. [www.eurokidsibd.com/](http://www.eurokidsibd.com/).
61. European Crohn's and Colitis Organisation. *United Registries for Clinical Assessment and Research (UR-CARE)*. [www.ecco-ibd.eu/science/ur-care.html](http://www.ecco-ibd.eu/science/ur-care.html).
62. *The Pediatric IBD Registry of the Italian Society of Gastroenterology Hepatology and Nutrition (SIGENP)*. [www.ibd-pediateriche.e-crf.it/](http://www.ibd-pediateriche.e-crf.it/).
63. Timmer A, Behrens R, Buderus S, et al.; CEDATA-GPGE Study Group. Childhood onset inflammatory bowel disease: predictors of delayed diagnosis from the CEDATA German-language pediatric inflammatory bowel disease registry. *J Pediatr* 2011;158:467–473.e2.
64. *The UK IBD registry*. [www.ibdregistry.org.uk/](http://www.ibdregistry.org.uk/).
65. *The PIBD-NET Inception Cohort and Safety Registry*. [www.clinicaltrials.gov/ct2/show/NCT03571373](http://www.clinicaltrials.gov/ct2/show/NCT03571373).
66. Petritsch W, Fuchs S, Berghold A, et al. Incidence of inflammatory bowel disease in the province of Styria, Austria, from 1997 to 2007: a population-based study. *J Crohns Colitis* 2013;7:58–69.
67. Kolek A, Janout V, Tichý M, Grepl M. The incidence of inflammatory bowel disease is increasing among children 15 years old and younger in the Czech Republic. *J Pediatr Gastroenterol Nutr* 2004;38:362–3.
68. Lophaven SN, Lyng E, Burisch J. The incidence of inflammatory bowel disease in Denmark 1980–2013: a nationwide cohort study. *Aliment Pharmacol Ther* 2017;45:961–72.
69. Norgard BM, Nielsen J, Fonager K, Kjeldsen J, Jacobsen BA, Qvist N. The incidence of ulcerative colitis [1995–2011] and Crohn's disease [1995–2012] – based on nationwide Danish registry data. *J Crohns Colitis* 2014;8:1274–80.
70. Vind I, Riis L, Jess T, et al.; DCCD study group. Increasing incidences of inflammatory bowel disease and decreasing surgery rates in Copenhagen City and County, 2003–2005: a population-based study from the Danish Crohn colitis database. *Am J Gastroenterol* 2006;101:1274–82.
71. Jussila A, Virta LJ, Kautiainen H, Rekiaro M, Nieminen U, Färkkilä MA. Increasing incidence of inflammatory bowel diseases between 2000

- and 2007: a nationwide register study in Finland. *Inflamm Bowel Dis* 2012;18:555–61.
72. Turunen P, Kolho KL, Auvinen A, Iltanen S, Huhtala H, Ashorn M. Incidence of inflammatory bowel disease in Finnish children, 1987–2003. *Inflamm Bowel Dis* 2006;12:677–83.
  73. Zurek M, Kern I, Manuwald U, et al. Epidemiology and care structures for children and adolescents and young adults up to the 26th year of life with inflammatory bowel diseases (IBD) in Leipzig/Saxony/Germany. *J Public Health* 2018;26:437–42.
  74. Ott C, Obermeier F, Thielers S, et al. The incidence of inflammatory bowel disease in a rural region of Southern Germany: a prospective population-based study. *Eur J Gastroenterol Hepatol* 2008;20:917–23.
  75. Müller KE, Lakatos PL, Arató A, et al.; Hungarian IBD Registry Group (HUPIR). Incidence, Paris classification, and follow-up in a nationwide incident cohort of pediatric patients with inflammatory bowel disease. *J Pediatr Gastroenterol Nutr* 2013;57:576–82.
  76. Lakatos L, Kiss LS, David G, et al. Incidence, disease phenotype at diagnosis, and early disease course in inflammatory bowel diseases in Western Hungary, 2002–2006. *Inflamm Bowel Dis* 2011;17:2558–65.
  77. Agnarsson U, Björnsson S, Jóhannsson JH, Sigurdsson L. Inflammatory bowel disease in Icelandic children 1951–2010. Population-based study involving one nation over six decades. *Scand J Gastroenterol* 2013;48:1399–404.
  78. Björnsson S, Tryggvason FP, Jónasson JG, et al. Incidence of inflammatory bowel disease in Iceland 1995–2009. A nationwide population-based study. *Scand J Gastroenterol* 2015;50:1368–75.
  79. Valpiani D, Manzi I, Mercuriali M, et al. A model of an inflammatory bowel disease population-based registry: The Forlì experience (1993–2013). *Dig Liver Dis* 2018;50:32–6.
  80. Castro M, Papadatou B, Baldassare M, et al. Inflammatory bowel disease in children and adolescents in Italy: data from the pediatric national IBD register (1996–2003). *Inflamm Bowel Dis* 2008;14:1246–52.
  81. Perminow G, Brackmann S, Lyckander LG, et al.; IBSEN-II Group. A characterization in childhood inflammatory bowel disease, a new population-based inception cohort from South-Eastern Norway, 2005–07, showing increased incidence in Crohn's disease. *Scand J Gastroenterol* 2009;44:446–56.
  82. Holko P, Kawalec P, Stawowczyk E. Prevalence and drug treatment practices of inflammatory bowel diseases in Poland in the years 2012–2014: an analysis of nationwide databases. *Eur J Gastroenterol Hepatol* 2018;30:456–64.
  83. Karolewska-Bochenek K, Lazowska-Przeorek I, Albrecht P, et al. Epidemiology of inflammatory bowel disease among children in Poland. A prospective, population-based, 2-year study, 2002–2004. *Digestion* 2009;79:121–9.
  84. Urlep D, Blagus R, Orel R. Incidence trends and geographical variability of pediatric inflammatory bowel disease in Slovenia: a nationwide study. *Biomed Res Int* 2015;2015:921730.
  85. Urlep D, Trop TK, Blagus R, Orel R. Incidence and phenotypic characteristics of pediatric IBD in northeastern Slovenia, 2002–2010. *J Pediatr Gastroenterol Nutr* 2014;58:325–32.
  86. Orel R, Kamhi T, Vidmar G, Mamula P. Epidemiology of pediatric chronic inflammatory bowel disease in central and western Slovenia, 1994–2005. *J Pediatr Gastroenterol Nutr* 2009;48:579–86.
  87. Martin-de-Carpi J, Rodriguez A, Ramos E, Jimenez S, Martinez-Gomez MJ, Medina E. Increasing incidence of pediatric inflammatory bowel disease in Spain (1996–2009): the SPIRIT Registry. *Inflamm Bowel Dis* 2013;19:73–80.
  88. López-Serrano P, Pérez-Calle JL, Carrera-Alonso E, et al. Epidemiologic study on the current incidence of inflammatory bowel disease in Madrid. *Rev Esp Enferm Dig* 2009;101:768–72.
  89. Arin Letamendia A, Borda Celaya F, Burusco Paternain MJ, et al. [High incidence rates of inflammatory bowel disease in Navarra (Spain). Results of a prospective, population-based study]. *Gastroenterol Hepatol* 2008;31:111–6.
  90. Rodrigo L, Riestra S, Niño P, et al. A population-based study on the incidence of inflammatory bowel disease in Oviedo (Northern Spain). *Rev Esp Enferm Dig* 2004;96:296–305.
  91. Juillerat P, Pittet V, Bulliard JL, et al. Prevalence of inflammatory bowel disease in the Canton of Vaud (Switzerland): a population-based cohort study. *J Crohns Colitis* 2008;2:131–41.
  92. Henderson P, Hansen R, Cameron FL, et al. Rising incidence of pediatric inflammatory bowel disease in Scotland. *Inflamm Bowel Dis* 2012;18:999–1005.
  93. Steed H, Walsh S, Reynolds N. Crohn's disease incidence in NHS Tayside. *Scott Med J* 2010;55:22–5.
  94. Gunesh S, Thomas GA, Williams GT, Roberts A, Hawthorne AB. The incidence of Crohn's disease in Cardiff over the last 75 years: an update for 1996–2005. *Aliment Pharmacol Ther* 2008;27:211–9.
  95. Ahmed M, Davies IH, Hood K, Jenkins HR. Incidence of paediatric inflammatory bowel disease in South Wales. *Arch Dis Child* 2006;91:344–5.
  96. Latour P, Louis E, Belaiche J. Incidence of inflammatory bowel disease in the area of Liège: a 3 years prospective study (1993–1996). *Acta Gastroenterol Belg* 1998;61:410–3.
  97. Vucelić B, Korać B, Sentić M, et al. Epidemiology of Crohn's disease in Zagreb, Yugoslavia: a ten-year prospective study. *Int J Epidemiol* 1991;20:216–20.
  98. Urne FU, Paerregaard A. [Chronic inflammatory bowel disease in children. An epidemiological study from eastern Denmark 1998–2000]. *Ugeskr Laeger* 2002;164:5810–4.
  99. Hammer T, Nielsen KR, Munkholm P, Burisch J, Lyng E. The faroese IBD study: incidence of inflammatory bowel diseases across 54 years of population-based data. *J Crohns Colitis* 2016;10:934–42.
  100. Jacobsen BA, Fallingborg J, Rasmussen HH, et al. Increase in incidence and prevalence of inflammatory bowel disease in northern Denmark: a population-based study, 1978–2002. *Eur J Gastroenterol Hepatol* 2006;18:601–6.
  101. Munkholm P, Langholz E, Nielsen OH, Kreiner S, Binder V. Incidence and prevalence of Crohn's disease in the county of Copenhagen, 1962–87: a sixfold increase in incidence. *Scand J Gastroenterol* 1992;27:609–14.
  102. Langholz E, Munkholm P, Krasilnikoff PA, Binder V. Inflammatory bowel diseases with onset in childhood. Clinical features, morbidity, and mortality in a regional cohort. *Scand J Gastroenterol* 1997;32:139–47.
  103. Lehtinen P, Ashorn M, Iltanen S, et al. Incidence trends of pediatric inflammatory bowel disease in Finland, 1987–2003, a nationwide study. *Inflamm Bowel Dis* 2011;17:1778–83.
  104. Molinié F, Gower-Rousseau C, Yzet T, et al. Opposite evolution in incidence of Crohn's disease and ulcerative colitis in Northern France (1988–1999). *Gut* 2004;53:843–8.
  105. Gower-Rousseau C, Vasseur F, Fumery M, et al. Epidemiology of inflammatory bowel diseases: new insights from a French population-based registry (EPIMAD). *Dig Liver Dis* 2013;45:89–94.
  106. Auvin S, Molinié F, Gower-Rousseau C, et al. Incidence, clinical presentation and location at diagnosis of pediatric inflammatory bowel disease: a prospective population-based study in northern France (1988–1999). *J Pediatr Gastroenterol Nutr* 2005;41:49–55.
  107. Tourtelier Y, Dabadie A, Tron I, et al. [Incidence of inflammatory bowel disease in children in Brittany (1994–1997). Breton association of study and research on digestive system diseases (Abermad)]. *Arch Pediatr* 2000;7:377–84.
  108. Gower-Rousseau C, Salomez JL, Dupas JL, et al. Incidence of inflammatory bowel disease in northern France (1988–1990). *Gut* 1994;35:1433–8.
  109. Gottrand F, Colombel JF, Moreno L, Salomez JL, Farriaux JP, Cortot A. [Incidence of inflammatory bowel diseases in children in the Nord-Pas-de-Calais region]. *Arch Fr Pediatr* 1991;48:25–8.
  110. Björnsson S, Jóhannsson JH, Oddsson E. Inflammatory bowel disease in Iceland, 1980–89. A retrospective nationwide epidemiologic study. *Scand J Gastroenterol* 1998;33:71–7.
  111. Sawczenko A, Sandhu BK. Presenting features of inflammatory bowel disease in Great Britain and Ireland. *Arch Dis Child* 2003;88:995–1000.
  112. Cottone M, Cipolla C, Orlando A, Oliva L, Aiala R, Puleo A. Epidemiology of Crohn's disease in Sicily: a hospital incidence study from 1987 to 1989. "The Sicilian Study Group of Inflammatory Bowel Disease". *Eur J Epidemiol* 1991;7:636–40.

113. Ranzi T, Bodini P, Zambelli A, et al. Epidemiological aspects of inflammatory bowel disease in a north Italian population: a 4-year prospective study. *Eur J Gastroenterol Hepatol* 1996;8:657–61.
114. Tragnone A, Corrao G, Miglio F, Caprilli R, Lanfranchi GA. Incidence of inflammatory bowel disease in Italy: a nationwide population-based study. Gruppo Italiano per lo Studio del Colon e del Retto (GISC). *Int J Epidemiol* 1996;25:1044–52.
115. Cachia E, Calleja N, Aakeroy R, Degaetano J, Vassallo M. Incidence of inflammatory bowel disease in Malta between 1993 and 2005: a retrospective study. *Inflamm Bowel Dis* 2008;14:550–3.
116. Romberg-Camps MJ, Hesselink-van de Kruijs MA, Schouten LJ, et al. Inflammatory bowel disease in South Limburg (the Netherlands) 1991–2002: Incidence, diagnostic delay, and seasonal variations in onset of symptoms. *J Crohns Colitis* 2009;3:115–24.
117. Russel MG. Changes in the incidence of inflammatory bowel disease: what does it mean? *Eur J Intern Med* 2000;11:191–6.
118. Bentsen BS, Moum B, Ekbo A. Incidence of inflammatory bowel disease in children in southeastern Norway: a prospective population-based study 1990–94. *Scand J Gastroenterol* 2002;37:540–5.
119. Størdal K, Jahnsen J, Bentsen BS, Moum B. Pediatric inflammatory bowel disease in southeastern Norway: a five-year follow-up study. *Digestion* 2004;70:226–30.
120. Moum B, Vatn MH, Ekbo A, et al. Incidence of Crohn's disease in four counties in southeastern Norway, 1990–93. A prospective population-based study. The Inflammatory Bowel South-Eastern Norway (IBSEN) Study Group of Gastroenterologists. *Scand J Gastroenterol* 1996;31:355–61.
121. Moum B, Vatn MH, Ekbo A, et al. Incidence of inflammatory bowel disease in southeastern Norway: evaluation of methods after 1 year of registration. Southeastern Norway IBD Study Group of Gastroenterologists. *Digestion* 1995;56:377–81.
122. Kildebo S, Breckan R, Nordgaard K, Burhol PG, Jorde R. The incidence of Crohn's disease in northern Norway from 1983 to 1986. Northern Norway Gastroenterology Society. *Scand J Gastroenterol* 1989;24:1265–70.
123. Olafsdottir EJ, Fluge G, Haug K. Chronic inflammatory bowel disease in children in western Norway. *J Pediatr Gastroenterol Nutr* 1989;8:454–8.
124. Lopez Miguel C, Sicilia B, Sierra E, Lopez Zaborras J, Arribas F, Gomollon F. Incidence of inflammatory bowel disease in Aragon: outcome of a prospective population-based study. *Gastroenterol Hepatol* 1999;22:323–8.
125. Brullet E, Bonfill X, Urrutia G, et al. [Epidemiological study on the incidence of inflammatory bowel disease in 4 Spanish areas. Spanish Group on the Epidemiological Study of Inflammatory Bowel Disease]. *Med Clin (Barc)* 1998;110:651–6.
126. Lindberg E, Lindquist B, Holmquist L, Hildebrand H. Inflammatory bowel disease in children and adolescents in Sweden, 1984–1995. *J Pediatr Gastroenterol Nutr* 2000;30:259–64.
127. Hildebrand H, Brydolf M, Holmquist L, Krantz I, Kristiansson B. Incidence and prevalence of inflammatory bowel disease in children in south-western Sweden. *Acta Paediatr* 1994;83:640–5.
128. Hildebrand H, Fredrikzon B, Holmquist L, Kristiansson B, Lindquist B. Chronic inflammatory bowel disease in children and adolescents in Sweden. *J Pediatr Gastroenterol Nutr* 1991;13:293–7.
129. Lindberg E, Jörnerot G. The incidence of Crohn's disease is not decreasing in Sweden. *Scand J Gastroenterol* 1991;26:495–500.
130. Lapidus A, Bernell O, Hellers G, Persson PG, Löfberg R. Incidence of Crohn's disease in Stockholm County 1955–1989. *Gut* 1997;41:480–6.
131. Nyhlin H, Danielsson A. Incidence of Crohn's disease in a defined population in northern Sweden, 1974–1981. *Scand J Gastroenterol* 1986;21:1185–92.
132. Lindquist BL, Järnerot G, Wickbom G. Clinical and epidemiological aspects of Crohn's disease in children and adolescents. *Scand J Gastroenterol* 1984;19:502–6.
133. Hellers G. Crohn's disease in Stockholm county 1955–1974. A study of epidemiology, results of surgical treatment and long-term prognosis. *Acta Chir Scand Suppl* 1979;490:1–84.
134. Ekbo A, Helmick C, Zack M, Adami HO. The epidemiology of inflammatory bowel disease: a large, population-based study in Sweden. *Gastroenterology* 1991;100:350–8.
135. Bergman L, Krause U. The incidence of Crohn's disease in central Sweden. *Scand J Gastroenterol* 1975;10:725–9.
136. Fellows IW, Freeman JG, Holmes GK. Crohn's disease in the city of Derby, 1951–85. *Gut* 1990;31:1262–5.
137. Devlin HB, Datta D, Dellipiani AW. The incidence and prevalence of inflammatory bowel disease in North Tees Health District. *World J Surg* 1980;4:183–93.
138. Watson AJ, Johnston AT, Barker PM, Youngson GG, Bisset WM, Mahomed AA. The presentation and management of juvenile-onset chronic inflammatory bowel disease in Northeastern Scotland. *J Pediatr Surg* 2002;37:83–6.
139. Armitage E, Drummond HE, Wilson DC, Ghosh S. Increasing incidence of both juvenile-onset Crohn's disease and ulcerative colitis in Scotland. *Eur J Gastroenterol Hepatol* 2001;13:1439–47.
140. Armitage E, Drummond H, Ghosh S, Ferguson A. Incidence of juvenile-onset Crohn's disease in Scotland. *Lancet* 1999;353:1496–7.
141. Barton JR, Gillon S, Ferguson A. Incidence of inflammatory bowel disease in Scottish children between 1968 and 1983; marginal fall in ulcerative colitis, three-fold rise in Crohn's disease. *Gut* 1989;30:618–22.
142. Kyle J. Crohn's disease in the northeastern and northern Isles of Scotland: an epidemiological review. *Gastroenterology* 1992;103:392–9.
143. Sinclair TS, Brunt PW, Mowat NA. Nonspecific proctocolitis in northeastern Scotland: a community study. *Gastroenterology* 1983;85:1–11.
144. Hassan K, Cowan FJ, Jenkins HR. The incidence of childhood inflammatory bowel disease in Wales. *Eur J Pediatr* 2000;159:261–3.
145. Rose JD, Roberts GM, Williams G, Mayberry JF, Rhodes J. Cardiff Crohn's disease jubilee: the incidence over 50 years. *Gut* 1988;29:346–51.
146. Thomas GA, Millar-Jones D, Rhodes J, Roberts GM, Williams GT, Mayberry JF. Incidence of Crohn's disease in Cardiff over 60 years: 1986–1990 an update. *Eur J Gastroenterol Hepatol* 1995;7:401–5.
147. Humphreys WG, Parks TG. Crohn's disease in northern Ireland – A retrospective survey of 159 cases. *Ir J Med Sci* 1975;144:437–46.
148. Salkic NN, Pavlovic-Calic N, Gegic A, Jovanovic P, Basic M. Ulcerative colitis in the Tuzla region of Bosnia and Herzegovina between 1995 and 2006: epidemiological and clinical characteristics. *Eur J Gastroenterol Hepatol* 2010;22:346–53.
149. Nørgård BM, Nielsen J, Fonager K, Kjeldsen J, Jacobsen BA, Qvist N. The incidence of ulcerative colitis [1995–2011] and Crohn's disease [1995–2012] – based on nationwide Danish registry data. *J Crohns Colitis* 2014;8:1274–80.
150. Rönnblom A, Samuelsson SM, Ekbo A. Ulcerative colitis in the county of Uppsala 1945–2007: incidence and clinical characteristics. *J Crohns Colitis* 2010;4:532–6.
151. Gower-Rousseau C, Dauchet L, Vernier-Massouille G, et al. The natural history of pediatric ulcerative colitis: a population-based cohort study. *Am J Gastroenterol* 2009;104:2080–8.
152. Dirks E, Förster S, Thom M, Quebe-Fehling E, Goebell H. [Prospective study of the incidence and prevalence of ulcerative colitis in a large urban population in Germany (western Ruhr area)]. *Z Gastroenterol* 1994;32:332–7.
153. Ladas SD, Mallas E, Giorgiotis K, et al. Incidence of ulcerative colitis in Central Greece: a prospective study. *World J Gastroenterol* 2005;11:1785–7.
154. Kildebo S, Nordgaard K, Aronsen O, Breckan R, Burhol PG, Jorde R. The incidence of ulcerative colitis in Northern Norway from 1983 to 1986. The Northern Norwegian Gastroenterology Society. *Scand J Gastroenterol* 1990;25:890–6.
155. Lindberg J, Stenling R, Palmqvist R, Rutegård J. Early onset of ulcerative colitis: long-term follow-up with special reference to colorectal cancer and primary sclerosing cholangitis. *J Pediatr Gastroenterol Nutr* 2008;46:534–8.
156. Stewénius J, Adnerhill I, Ekelund G, et al. Ulcerative colitis and indeterminate colitis in the city of Malmö, Sweden. A 25-year incidence study. *Scand J Gastroenterol* 1995;30:38–43.
157. Srivastava ED, Mayberry JF, Morris TJ, et al. Incidence of ulcerative colitis in Cardiff over 20 years: 1968–87. *Gut* 1992;33:256–8.

## Appendix 1

### Search terms used

1. [incidence OR prevalence] AND [crohn's OR colitis OR inflammatory bowel disease OR IBD] AND [children OR adolescent OR pediatric OR young] AND [Albania OR Andorra OR Armenia OR Austria OR Azerbaijan OR Belarus OR Belgium OR Bosnia OR Bulgaria OR Croatia OR Czech\* OR Cyprus OR Denmark OR Estonia OR France OR Germany OR Georgia OR Hungary OR Iceland OR Ireland OR Italy OR Kazakhstan OR Kosovo OR Latvia OR Lithuania OR Luxembourg OR Liechtenstein OR Malta OR Moldova OR Monaco OR Macedonia OR Montenegro OR Netherlands OR Holland OR Norway OR Poland OR Portugal OR Russia OR Romania OR San Marino OR Slovakia OR Sweden OR Switzerland OR Spain OR Slovenia OR Serbia OR Soviet OR Turkey OR Ukraine OR Vatican OR Yugoslavia OR England OR Wales OR Scotland OR UK]
2. [crohn's OR colitis OR inflammatory bowel disease OR IBD] AND [children OR adolescent OR pediatric OR young] AND [100 000 or million]

**Appendix 2.** Incidence and prevalence rates for paediatric Crohn's disease reported across Europe: studies are ordered alphabetically and then in reverse chronological order: studies are grouped since 2000 and from 1970 to 1999

| Country                          | City/Region                                                           | Study information sources & design <sup>a</sup> | Patient age group [years] | Study period | No. of patients [or over entire study period] | Incidence per 100 000 population | Prevalence per 100 000 population | Authors & reference                                |
|----------------------------------|-----------------------------------------------------------------------|-------------------------------------------------|---------------------------|--------------|-----------------------------------------------|----------------------------------|-----------------------------------|----------------------------------------------------|
| <b>Study periods since 2000:</b> |                                                                       |                                                 |                           |              |                                               |                                  |                                   |                                                    |
| Austria                          | Styria                                                                | HR, Lab, AHD, SPC, Pro, ICV <sup>b</sup>        | 0–19                      | 1997–2007    | –                                             | 4.8                              | –                                 | Petritsch W <i>et al</i> , 2013 <sup>66</sup>      |
| Bosnia & Herzegovina             | Tuzla region                                                          | HR, Lab, Ret, ICV <sup>b</sup>                  | 0–14                      | 1995–2006    | 3                                             | 0.3                              | –                                 | Pavlovic-Calic N <i>et al</i> , 2008 <sup>10</sup> |
| Croatia                          | Primorsko-Goranska County                                             | HR, Lab, Pro, ICV <sup>b</sup>                  | 0–19                      | 1995–2001    | –                                             | 8                                | –                                 | Sincić BM <i>et al</i> , 2006 <sup>15</sup>        |
| Czech Republic                   | Pilsen region                                                         | HR, Lab, Pro, ICV                               | 0–18                      | 2000–2015    | 105                                           | 6.2                              | –                                 | Scharwz J, 2017 <sup>35</sup>                      |
| Czech Republic                   | 25 centres                                                            | HR, Lab, Pro, ICV                               | 0–15                      | 2001         | –                                             | 1.3                              | –                                 | Pozler O <i>et al</i> , 2006 <sup>37</sup>         |
| Czech Republic                   | Moravia                                                               | HR, Lab, Ret, ICV                               | 0–14                      | 1998–2001    | 16                                            | 2.7                              | –                                 | Kolek A <i>et al</i> , 2004 <sup>67</sup>          |
|                                  |                                                                       |                                                 |                           | 2010–2013    | –                                             | 7.8                              | –                                 |                                                    |
|                                  |                                                                       |                                                 |                           | 2005–2009    | –                                             | 6.3                              | –                                 |                                                    |
| Denmark                          | National                                                              | AHD, Ret                                        | 0–16                      | 2000–2004    | –                                             | 4.7                              | –                                 | Larsen MD <i>et al</i> , 2016 <sup>12</sup>        |
| Denmark                          | National                                                              | AHD, Ret <sup>b</sup>                           | 0–14                      | 2008–2013    | –                                             | 4.5                              | –                                 | Lophaven SN <i>et al</i> , 2017 <sup>68</sup>      |
| Denmark                          | Funen & Herlev                                                        | HR, Lab, Pro, ICV                               | 0–14                      | 2010         | 6                                             | 3.8                              | –                                 | Burisch J <i>et al</i> , 2014 <sup>21</sup>        |
| Denmark                          | National                                                              | AHD, Ret <sup>b</sup>                           | 0–14                      | 1995–2012    | 512                                           | 3.0                              | –                                 | Nørgård BM <i>et al</i> , 2014 <sup>69</sup>       |
| Denmark                          | Copenhagen Eastern                                                    | AHD, HR, Ret <sup>b</sup>                       | 0–15                      | 2003–2005    | –                                             | 2.7                              | –                                 | Vind I <i>et al</i> , 2006 <sup>70</sup>           |
| Denmark                          |                                                                       | HR, AHD, Reg, Pro, ICV                          | 0–14                      | 2002–2004    | 64                                            | 3.1                              | 8.2                               | Jakobsen C <i>et al</i> , 2008 <sup>28</sup>       |
| Estonia                          | Tartu County                                                          | HR, Lab, Pro, ICV                               | 0–14                      | 2010         | 3                                             | 5.6                              | –                                 | Burisch J <i>et al</i> , 2014 <sup>21</sup>        |
|                                  |                                                                       |                                                 |                           | 2010–2014    | 251                                           | 5.3                              | –                                 |                                                    |
|                                  |                                                                       |                                                 |                           | 2005–2009    | 269                                           | 5.6                              | –                                 |                                                    |
| Finland                          | National                                                              | AHD, Ret                                        | 0–15                      | 2000–2004    | 206                                           | 4.1                              | –                                 | Virta LJ <i>et al</i> , 2017 <sup>24</sup>         |
| Finland                          | National                                                              | HR, Lab, Reg, Pro <sup>b</sup>                  | 0–14                      | 2000–2007    | –                                             | 4                                | –                                 | Jussila A <i>et al</i> , 2012 <sup>71</sup>        |
| Finland                          | Helsinki & Tampere North [Nord, Pas-de-Calais, Somme, Seine-Maritime] | HR, Lab, Ret, ICV                               | 0–17                      | 2000–2003    | –                                             | 2.6                              | –                                 | Turunen P <i>et al</i> , 2006 <sup>72</sup>        |
|                                  |                                                                       |                                                 |                           | 2006–2011    | –                                             | 7.3                              | –                                 |                                                    |
| France                           |                                                                       | HR, Lab, Reg, Pro, ICV                          | 0–16                      | 2000–2005    | [1032 in 1988–2011]                           | 5.1                              | –                                 | Bequet E <i>et al</i> , 2017 <sup>13</sup>         |
| France                           | Corsica                                                               | HR, Lab, Pro, ICV                               | 0–19                      | 2002–2003    | 20                                            | 4.1                              | –                                 | Abakar-Mahamat A <i>et al</i> , 2007 <sup>22</sup> |
| Germany                          | Saxony                                                                | HR, Lab, Reg, Pro, ICV                          | 0–17                      | 2005–2009    | 18                                            | 5.7                              | –                                 | Zurek M <i>et al</i> , 2018 <sup>73</sup>          |
| Germany                          | Oberpfalz                                                             | HR, Lab, Pro, ICV <sup>b</sup>                  | 0–14                      | 2004–2006    | –                                             | 2.4                              | –                                 | Ott C <i>et al</i> , 2008 <sup>74</sup>            |
| Hungary                          | National                                                              | AHD, Ret                                        | 0–19                      | 2011–2013    | –                                             | –                                | ~60                               | Kurri Z <i>et al</i> , 2016 <sup>29</sup>          |
| Hungary                          | Veszpremi province                                                    | HR, Lab, Pro, ICV                               | 0–18                      | 2007–2011    | 95                                            | 7.2                              | –                                 | Lovasz BD <i>et al</i> , 2014 <sup>16</sup>        |
| Hungary                          | National                                                              | HR, Lab, Pro, ICV                               | 0–17                      | 2007–2009    | 265                                           | 4.7                              | –                                 | Müller KE <i>et al</i> , 2013 <sup>75</sup>        |



## Appendix 2. Continued

| Country       | City/Region          | Study information sources & design <sup>a</sup> | Patient age group [years] | Study period | No. of patients [or over entire study period] | Incidence per 100 000 population | Prevalence per 100 000 population | Authors & reference                                      |
|---------------|----------------------|-------------------------------------------------|---------------------------|--------------|-----------------------------------------------|----------------------------------|-----------------------------------|----------------------------------------------------------|
| Hungary       | Veszprem province    | HR, Lab, Pro, ICV <sup>b</sup>                  | 0–20                      | 2002–2006    | –                                             | 6.6                              | –                                 | Lakatos L <i>et al</i> , 2011 <sup>76</sup>              |
| Iceland       | National             | HR, Lab, Ret, ICV                               | 0–16                      | 2001–2010    | [44 in 1951–2010]                             | 2.3                              | –                                 | Agnarsson U <i>et al</i> , 2013 <sup>77</sup>            |
| Iceland       | National             | HR, Lab, Ret, ICV <sup>b</sup>                  | 0–19                      | 1995–2009    | –                                             | 4                                | –                                 | Björnsson S <i>et al</i> , 2015 <sup>78</sup>            |
| Ireland       | Dublin               | HR, Lab, Ret, ICV                               | 0–15                      | 2000–2010    | 238                                           | 2.3                              | –                                 | Hope B <i>et al</i> , 2012 <sup>38</sup>                 |
| Italy         | Northern             | HR, Lab, Pro, ICV                               | 0–14                      | 2010         | 1                                             | 0.3                              | –                                 | Burisch J <i>et al</i> , 2014 <sup>21</sup>              |
| Italy         | Forli                | HR, Lab, Ret, ICV <sup>b</sup>                  | 0–19                      | 1993–2013    | –                                             | 2.5                              | –                                 | Valpiani D <i>et al</i> , 2018 <sup>79</sup>             |
| Italy         | National             | HR, Lab, Pro, ICV <sup>c</sup>                  | 0–17                      | 1996–2003    | 635                                           | 0.8                              | –                                 | Castro M <i>et al</i> , 2008 <sup>80</sup>               |
| Moldova       | Chisinau             | HR, Lab, Pro, ICV                               | 0–14                      | 2010         | 1                                             | 0.2                              | –                                 | Burisch J <i>et al</i> , 2014 <sup>21</sup>              |
| Netherlands   | National             | HR, Lab, Pro, ICV                               | 0–17                      | 1999–2001    | –                                             | 2.1                              | –                                 | Van der Zaag-Loonen HJ <i>et al</i> , 2004 <sup>23</sup> |
| Norway        | Akershus             | HR, Lab, SPC, Pro, ICV                          | 0–17                      | 2005–2007    | 39                                            | 6.8                              | –                                 | Perminow G <i>et al</i> , 2009 <sup>81</sup>             |
| Norway        | Oslo                 | HR, Lab, Pro, ICV                               | 0–15                      | 1999–2004    | 16                                            | 3.6                              | –                                 | Perminow G <i>et al</i> , 2006 <sup>39</sup>             |
| Poland        | National             | AHD, Ret                                        | 0–18                      | 2012–2014    | –                                             | –                                | 27                                | Holko P <i>et al</i> , 2018 <sup>82</sup>                |
| Poland        | National             | HR, Lab, Ret, ICV                               | 0–18                      | 2002–2004    | 166                                           | 0.6                              | –                                 | Karolewska-Bochenek K <i>et al</i> , 2009 <sup>83</sup>  |
| Slovenia      | National             | HR, Lab, Ret, ICV                               | 0–18                      | 2002–2010    | 167                                           | 4.5                              | –                                 | Urlep D <i>et al</i> , 2015 <sup>84</sup>                |
| Slovenia      | North East           | HR, Lab, Ret, ICV                               | 0–18                      | 2002–2010    | 65                                            | 4.6                              | –                                 | Urlep D <i>et al</i> , 2014 <sup>85</sup>                |
| Slovenia      | Western              | HR, Lab, Ret, ICV                               | 0–18                      | 2000–2005    | 46                                            | 2.9                              | –                                 | Orel R <i>et al</i> , 2009 <sup>86</sup>                 |
| Spain         | Vigo                 | HR, Lab, Pro, ICV <sup>b</sup>                  | 0–14                      | 2010         | –                                             | 1.2                              | –                                 | Fernández A <i>et al</i> , 2015 <sup>40</sup>            |
| Spain         | National, 78 centres | HR, Ret <sup>b</sup>                            | 0–17                      | 2009         | –                                             | 1.7                              | –                                 | Martin-de-Carpi J <i>et al</i> , 2013 <sup>87</sup>      |
| Spain         | Madrid               | HR, Lab, Pro, ICV <sup>b</sup>                  | 0–14                      | 2003–2005    | –                                             | 2.1                              | –                                 | López-Serrano P <i>et al</i> , 2009 <sup>88</sup>        |
| Spain         | Navarra              | HR, Lab, Pro, ICV <sup>b</sup>                  | 0–14                      | 2001–2003    | 4                                             | 1.7                              | –                                 | Arin Letamendia A <i>et al</i> , 2008 <sup>89</sup>      |
| Spain         | Oviedo               | HR, Lab, Reg, Pro, ICV <sup>b</sup>             | 0–15                      | 2000–2002    | –                                             | 5.8                              | –                                 | Rodrigo L <i>et al</i> , 2004 <sup>90</sup>              |
| Sweden        | National             | AHD, Ret                                        | 0–17                      | 2010         | 548                                           | –                                | 29                                | Ludvigsson JF <i>et al</i> , 2017 <sup>40</sup>          |
| Sweden        | Uppsala County       | HR, Lab, Ret, ICV <sup>b</sup>                  | 0–16                      | 2005–2009    | –                                             | 10                               | –                                 | Sjöberg D <i>et al</i> , 2014 <sup>11</sup>              |
| Sweden        | Stockholm County     | HR, Lab, Ret, ICV                               | 0–15                      | 2002–2007    | 96                                            | 9.2                              | –                                 | Malmberg P <i>et al</i> , 2013 <sup>14</sup>             |
| Switzerland   | Canton of Vaud       | HR, Lab, Ret, ICV <sup>b</sup>                  | 0–19                      | 2003–2005    | –                                             | –                                | 20                                | Juillerat P <i>et al</i> , 2008 <sup>91</sup>            |
| UK – England  | Wessex region        | HR, Lab, Ret                                    | 0–16                      | 2008–2012    | 151                                           | 5.9                              | –                                 | Ashron JJ <i>et al</i> , 2014 <sup>34</sup>              |
| UK – Scotland | National             | HR, Lab, Pro, ICV                               | 0–15                      | 2002–2006    | 98                                            | 3.8                              | –                                 | Henderson P <i>et al</i> , 2012 <sup>92</sup>            |
| UK – Scotland | Tayside              | HR, Lab, Ret, ICV                               | 0–19                      | 1998–2007    | 29                                            | 5.9                              | –                                 | Steed H <i>et al</i> , 2010 <sup>93</sup>                |



## Appendix 2. Continued

| Country     | City/Region                                        | Study information sources & design <sup>a</sup> | Patient age group [years] | Study period                                     | No. of patients [or over entire study period] | Incidence per 100 000 population | Prevalence per 100 000 population | Authors & reference                                 |
|-------------|----------------------------------------------------|-------------------------------------------------|---------------------------|--------------------------------------------------|-----------------------------------------------|----------------------------------|-----------------------------------|-----------------------------------------------------|
| France      | Somme, Seine Maritime]                             | HR, Lab, Reg, Pro, ICV                          | 0–16                      | 1988–1993                                        | [1032 in 1988–2011]                           | 3.4                              | –                                 | Bequet E <i>et al</i> , 2017 <sup>13</sup>          |
| France      | North [Nord, Pas-de-Calais, Somme, Seine Maritime] | HR, Lab, Reg, Pro, ICV                          | 0–16                      | 1988–1999                                        | 367                                           | 2.3                              | –                                 | Auvin S <i>et al</i> , 2005 <sup>106</sup>          |
| France      | Brittany                                           | HR, Lab, Pro, ICV                               | 0–16                      | 1994–1997                                        | 43                                            | 1.6                              | –                                 | Tourtelier Y <i>et al</i> , 2000 <sup>107</sup>     |
| France      | North [Nord, Pas-de-Calais, Somme]                 | HR, Lab, Reg, Pro, ICV <sup>b</sup>             | 0–19                      | 1988–1990                                        | –                                             | 3.5                              | –                                 | Gower-Rousseau C <i>et al</i> , 1994 <sup>108</sup> |
| France      | North [Nord, Pas-de-Calais]                        | HR, Lab, Reg, Pro, ICV                          | 0–16                      | 1988–1989                                        | 31                                            | 2.1                              | –                                 | Gottrand F <i>et al</i> , 1991 <sup>109</sup>       |
| Hungary     | Veszprem province                                  | HR, Lab, Pro, ICV <sup>b</sup>                  | 0–20                      | 1977–2001<br>1991–2000<br>1981–1990<br>1971–1980 | –<br>–<br>–<br>[44 in 1951–2010]              | 2.1<br>2.5<br>1.2<br>0.1         | –                                 | Lakatos L <i>et al</i> , 2004 <sup>36</sup>         |
| Iceland     | National                                           | HR, Lab, Ret, ICV                               | 0–16                      | 1990–1994                                        | –                                             | 4.5                              | –                                 | Agnarsson U <i>et al</i> , 2013 <sup>77</sup>       |
| Iceland     | National                                           | HR, Lab, SPC, Ret, ICV <sup>b</sup>             | 0–19                      | 1980–1989                                        | –                                             | 0.2                              | –                                 | Björnsson S <i>et al</i> , 2000 <sup>18</sup>       |
| Iceland     | National                                           | HR, Lab, Ret, ICV <sup>b</sup>                  | 0–19                      | 1980–1989                                        | –                                             | 0.2                              | –                                 | Björnsson S <i>et al</i> , 1998 <sup>110</sup>      |
| Ireland     | National                                           | HR, Lab, Reg, Pro                               | 0–19                      | 1998–1999                                        | –                                             | 2.3                              | –                                 | Sawczenko A <i>et al</i> , 2003 <sup>111</sup>      |
| Italy       | Sicily                                             | HR, Lab, Ret, ICV <sup>b</sup>                  | 0–19                      | 1987–1989                                        | 8                                             | 0.6                              | –                                 | Cottone M <i>et al</i> , 1991 <sup>112</sup>        |
| Italy       | Lombardia                                          | HR, Lab, SP, Pro, ICV <sup>b</sup>              | 0–14                      | 1990–1993                                        | –                                             | 1.2                              | –                                 | Ranzi T <i>et al</i> , 1996 <sup>113</sup>          |
| Italy       | Eight cities                                       | HR, Lab, SPC, Pro, ICV <sup>b</sup>             | 0–19                      | 1989–1992                                        | –                                             | 1.0                              | –                                 | Tragnone A <i>et al</i> , 1996 <sup>114</sup>       |
| Malta       | National                                           | HR, Lab, Ret, ICV <sup>b</sup>                  | 0–15                      | 1993–2005                                        | –                                             | 0.5                              | –                                 | Cachia E <i>et al</i> , 2008 <sup>115</sup>         |
| Netherlands | South Limburg                                      | HR, Lab, Reg, Pro, ICV <sup>b</sup>             | 0–19                      | 1991–2002                                        | –                                             | 4.0                              | –                                 | Rombert-Camps JL <i>et al</i> , 2009 <sup>116</sup> |
| Netherlands | South Limburg                                      | HR, Lab, SPC, PCR, Pro, ICV <sup>b</sup>        | 0–14                      | 1991–1995                                        | –                                             | 1.8                              | –                                 | Russel MG <i>et al</i> , 1998 <sup>117</sup>        |
| Norway      | Akershus                                           | HR, Lab, Pro, ICV                               | 0–15                      | 1993–1998                                        | 8                                             | 2.0                              | –                                 | Perminow G <i>et al</i> , 2006 <sup>39</sup>        |
| Norway      | South East                                         | HR, Lab, Pro, ICV                               | 0–15                      | 1990–1993                                        | 13                                            | 2.0                              | –                                 | Bentsen BS <i>et al</i> , 2002 <sup>118</sup>       |
| Norway      | South East                                         | HR, Lab, Pro, Ret, ICV                          | 0–15                      | 1990–1993                                        | 19                                            | 2.7                              | –                                 | Stordal K <i>et al</i> , 2004 <sup>119</sup>        |
| Norway      | South East, 4 countries                            | HR, Lab, Pro, ICV <sup>b</sup>                  | 0–14                      | 1990–1993                                        | –                                             | 0.9                              | –                                 | Moum B <i>et al</i> , 1996 <sup>20</sup>            |
| Norway      | Fredrikstad                                        | HR, Lab, Pro, ICV <sup>b</sup>                  | 0–14                      | 1990                                             | –                                             | 0.5                              | –                                 | Moum B <i>et al</i> , 1995 <sup>121</sup>           |
| Norway      | Northern                                           | HR, Lab, SPC, Pro, ICV <sup>b</sup>             | 0–19                      | 1983–1986                                        | –                                             | 4                                | –                                 | Kildebo S <i>et al</i> , 1989 <sup>122</sup>        |

## Appendix 2. Continued

| Country        | City/Region                       | Study information sources & design <sup>a</sup> | Patient age group [years] | Study period | No. of patients [or over entire study period] | Incidence per 100 000 population | Prevalence per 100 000 population | Authors & reference                                 |
|----------------|-----------------------------------|-------------------------------------------------|---------------------------|--------------|-----------------------------------------------|----------------------------------|-----------------------------------|-----------------------------------------------------|
| Norway         | Western, 3 counties               | HR, Lab, SPC, Pro, ICV                          | 0–15                      | 1984–1985    | 10                                            | 2.5                              | –                                 | Olafsdottir EJ <i>et al</i> , 1989 <sup>123</sup>   |
| Slovenia       | Western                           | HR, Lab, Ret, ICV                               | 0–18                      | 1994–1999    | 36                                            | 2.0                              | –                                 | Orel R <i>et al</i> , 2009 <sup>86</sup>            |
| Spain          | National, 78 centres              | HR, Ret <sup>b</sup>                            | 0–17                      | 1996         | –                                             | 0.5                              | –                                 | Martin-de-Carpi J <i>et al</i> , 2013 <sup>87</sup> |
| Spain          | Aragon                            | HR, Lab, Pro, ICV <sup>b</sup>                  | 0–14                      | 1992–1994    | –                                             | 0.3                              | –                                 | Lopez Mignuel C <i>et al</i> , 1999 <sup>124</sup>  |
| Spain          | Sabadell, Vigo, Mallorca & Morril | HR, Lab, Pro, ICV <sup>b</sup>                  | 0–13                      | 1991–1993    | –                                             | 1.6                              | –                                 | Brunletta E <i>et al</i> , 1998 <sup>125</sup>      |
| Sweden         | Stockholm County                  | HR, Lab, Pro, ICV                               | 0–15                      | 1990–2001    | 102                                           | 4.9                              | –                                 | Hildebrand H <i>et al</i> , 2003 <sup>17</sup>      |
| Sweden         | North Stockholm County            | HR, Lab, Ret, ICV                               | 0–16                      | 1990–1998    | 50                                            | 3.8                              | –                                 | Asklung J <i>et al</i> , 1999 <sup>32</sup>         |
| Sweden         | Stockholm                         | HR, Lab, Pro, ICV                               | 0–15                      | 1993–1995    | –                                             | 1.3                              | –                                 | Lindberg E <i>et al</i> , 2000 <sup>26</sup>        |
| Sweden         | Göteborg & South West             | HR, Lab, Ret, ICV                               | 0–15                      | 1984–1986    | –                                             | 1.2                              | –                                 | Hildebrand H <i>et al</i> , 1994 <sup>127</sup>     |
| Sweden         | National                          | HR, Lab, Pro, ICV                               | 0–15                      | 1984–1985    | 187                                           | –                                | 6.2                               | Hildebrand H <i>et al</i> , 1991 <sup>128</sup>     |
| Sweden         | Örebro                            | HR, Lab, Ret, SPC, ICV                          | 0–14                      | 1978–1987    | –                                             | 3.3                              | –                                 | Lindberg E and Jörnerot G, 1991 <sup>129</sup>      |
| Sweden         | Stockholm County                  | AHD, Ret <sup>b</sup>                           | 0–14                      | 1975–1989    | –                                             | 2.4                              | –                                 | Lapidus A <i>et al</i> , 1997 <sup>130</sup>        |
| Sweden         | Umeå and North                    | HR, Lab, Ret, ICV                               | 0–19                      | 1974–1981    | 49                                            | 3.5                              | –                                 | Nyhlin H, Danielson A, 1986 <sup>131</sup>          |
| Sweden         | Örebro County                     | HR, Lab, Ret, ICV                               | 0–15                      | 1980         | 34                                            | –                                | 41                                | Lindquist BL <i>et al</i> , 1984 <sup>132</sup>     |
| Sweden         | Stockholm County                  | HR, Lab, Ret, ICV                               | 0–14                      | 1970–1974    | –                                             | 1.0                              | –                                 | Hellers G <i>et al</i> , 1979 <sup>133</sup>        |
| Sweden         | Uppsala region                    | AHD, Lab, Ret <sup>b</sup>                      | 0–19                      | 1975–1983    | –                                             | 4                                | –                                 | Ekbohm A <i>et al</i> , 1991 <sup>134</sup>         |
| Sweden         | Uppsala & Västmanland             | HR, Lab, Ret, ICV <sup>b</sup>                  | 0–19                      | 1965–1974    | –                                             | 4.5                              | –                                 | Bergman L & Krause U, 1975 <sup>135</sup>           |
| UK and Ireland | National                          | HR, Lab, Reg, Pro                               | 0–15                      | 1998–1999    | 379                                           | 3.1                              | –                                 | Sawczenko A <i>et al</i> , 2003 <sup>111</sup>      |
| UK – England   | National                          | HR, Lab, Reg, Pro                               | 0–15                      | 1998–1999    | –                                             | 3.1                              | –                                 | Sawczenko A <i>et al</i> , 2003 <sup>111</sup>      |
| UK – England   | Derby                             | HR, Lab, Ret, ICV <sup>b</sup>                  | 0–19                      | 1976–1985    | 15                                            | 3.2                              | –                                 | Fellows IW <i>et al</i> , 1990 <sup>136</sup>       |
| UK – England   | North Tees region                 | HR, Lab, Ret, ICV <sup>b</sup>                  | 0–19                      | 1971–1977    | 3                                             | 0.1                              | –                                 | Devlin HB <i>et al</i> , 1980 <sup>137</sup>        |
| UK – Scotland  | National                          | HR, Lab, Reg, Pro                               | 0–15                      | 1998–1999    | –                                             | 4.2                              | –                                 | Sawczenko A <i>et al</i> , 2003 <sup>111</sup>      |

## Appendix 2. Continued

| Country        | City/Region                 | Study information sources & design <sup>a</sup> | Patient age group [years] | Study period | No. of patients [or over entire study period] | Incidence per 100 000 population | Prevalence per 100 000 population | Authors & reference                             |
|----------------|-----------------------------|-------------------------------------------------|---------------------------|--------------|-----------------------------------------------|----------------------------------|-----------------------------------|-------------------------------------------------|
| UK – Scotland  | North East                  | HR, Lab, Ret, ICV                               | 0–16                      | 1990–1999    | –                                             | 4.4                              | –                                 | Watson AJM <i>et al</i> , 2002 <sup>138</sup>   |
| UK – Scotland  | National                    | HR, Lab, AHD, Ret, ICV                          | 0–16                      | 1995         | 150                                           | –                                | 13.7                              | Armitage E <i>et al</i> , 2001 <sup>139</sup>   |
| UK – Scotland  | National                    | HR, Lab, Ret, ICV                               | 0–15                      | 1990–1995    | 167                                           | 2.9                              | –                                 | Henderson P <i>et al</i> , 2012 <sup>2</sup>    |
|                | North South                 |                                                 |                           |              | –                                             | 3.1                              | –                                 |                                                 |
|                | South                       |                                                 |                           |              | –                                             | 2.1                              | –                                 |                                                 |
| UK – Scotland  | National                    | AHD, HR, Ret, ICV                               | 0–16                      | 1981–1995    | 383                                           | 2.3                              | –                                 | Armitage E <i>et al</i> , 2004 <sup>44</sup>    |
|                |                             |                                                 |                           | 1981–1992    | –                                             | 2.3                              | –                                 |                                                 |
| UK – Scotland  | National                    | AHD, HR, Ret, ICV <sup>b</sup>                  | 0–16                      | 1968–1979    | –                                             | 1.1                              | –                                 | Armitage E <i>et al</i> , 1999 <sup>40</sup>    |
| UK – Scotland  | National                    | AHD, HR, Ret, ICV <sup>b</sup>                  | 0–15                      | 1968–1983    | –                                             | 1.2                              | –                                 | Barton JR <i>et al</i> , 1989 <sup>141</sup>    |
| UK – Scotland  | North East & Northern Isles | HR, Lab, Ret, ICV                               | 0–19                      | 1955–1988    | 146                                           | 4.5                              | –                                 | Kyle J, 1992 <sup>142</sup>                     |
| UK – Scotland  | North East & Northern Isles | HR, Lab, Ret, ICV <sup>b</sup>                  | 0–19                      | 1967–1976    | –                                             | 2.4                              | –                                 | Sinclair TS <i>et al</i> , 1983 <sup>143</sup>  |
| UK – Wales     | National                    | HR, Lab, Reg, Pro                               | 0–15                      | 1998–1999    | –                                             | 3.2                              | –                                 | Sawczenko A <i>et al</i> , 2003 <sup>111</sup>  |
| UK – Wales     | South Glamorgan             | HR, Lab, Ret, ICV                               | 0–16                      | 1995–1997    | 20                                            | 1.4                              | –                                 | Hassan K <i>et al</i> , 2000 <sup>144</sup>     |
|                |                             |                                                 |                           | 1993         | –                                             | –                                | 16.6                              |                                                 |
|                |                             |                                                 |                           | 1989–1993    | –                                             | 3.1                              | –                                 |                                                 |
| UK – Wales     | South Glamorgan             | HR, Lab, Ret, ICV                               | 0–15                      | 1983–1988    | [21 in 1983–1988]                             | 1.3                              | –                                 | Cosgrove M, 1996 <sup>33</sup>                  |
|                |                             |                                                 |                           | 1981–1995    | –                                             | 3.1                              | –                                 |                                                 |
| UK – Wales     | Cardiff                     | HR, Lab, Ret, ICV <sup>b</sup>                  | 0–19                      | 1971–1980    | –                                             | 1.9                              | –                                 | Rose JDR <i>et al</i> , 1988 <sup>145</sup>     |
| UK – Wales     | Cardiff                     | HR, Lab, SPC, Ret, ICV <sup>b</sup>             | 0–19                      | 1986–1990    | –                                             | 2.8                              | –                                 | Thomas GA <i>et al</i> , 1995 <sup>146</sup>    |
| UK – N Ireland | National                    | HR, Lab, Reg, Pro                               | 0–15                      | 1998–1999    | –                                             | 2.4                              | –                                 | Sawczenko A <i>et al</i> , 2003 <sup>111</sup>  |
| UK – N Ireland | National                    | HR, Lab, Ret, ICV <sup>b</sup>                  | 0–19                      | 1966–1973    | 10                                            | 0.3                              | –                                 | Humphreys WG <i>et al</i> , 1975 <sup>147</sup> |

Study sources: HR = hospital/clinical records; Lab = histopathology records; Reg = disease register; SPC = survey of primary care; AHD = administrative hospital data; PCR = primary care records; Pro = prospective surveillance; Ret = retrospective review; ICV = individual case validation.

<sup>b</sup>Incidence and/or prevalence are calculated from graphs presented in the published papers

<sup>4</sup>Incidence and/or prevalence are calculated from numbers of cases and population cited.



Appendix 3. Incidence and prevalence rates for paediatric ulcerative colitis reported across Europe: studies are ordered alphabetically and then in reverse chronological order: studies are grouped since 2000 and from 1970 to 1999

| Country                          | City/Region               | Study information sources & design <sup>a</sup> | Patient age group [years] | Study period | No. of patients in cited years [or over entire study period] | Incidence per 100 000 population | Prevalence per 100 000 population | Authors & reference                  |
|----------------------------------|---------------------------|-------------------------------------------------|---------------------------|--------------|--------------------------------------------------------------|----------------------------------|-----------------------------------|--------------------------------------|
| <b>Study periods since 2000:</b> |                           |                                                 |                           |              |                                                              |                                  |                                   |                                      |
| Austria                          | Styria                    | HR, Lab, AHD, SPC, Pro, ICV <sup>b</sup>        | 0-19                      | 1997-2007    | -                                                            | 2.2                              | -                                 | Petrtsch W et al, 2013 <sup>66</sup> |
| Bosnia & Herzegovina             | Tuzla region              | HR, Lab, Ret, ICV                               | 0-14                      | 1995-2006    | 2                                                            | 0.2                              | -                                 | Salkic NN et al, 2010 <sup>148</sup> |
| Croatia                          | Primorsko-Goranska County | HR, Lab, Pro, ICV <sup>b</sup>                  | 0-19                      | 1995-2001    | -                                                            | 0.9                              | -                                 | Sincić BM et al, 2006 <sup>45</sup>  |
| Czech Republic                   | Pilsen region             | HR, Lab, Pro, ICV                               | 0-18                      | 2000-2015    | 48                                                           | 2.4                              | -                                 | Scharwz J, 2017 <sup>35</sup>        |
| Czech Republic                   | Moravia                   | HR, Lab, Ret, ICV                               | 0-14                      | 1998-2001    | 11                                                           | 1.8                              | -                                 | Kolek A et al, 2004 <sup>67</sup>    |
|                                  |                           |                                                 |                           | 2010-2013    | -                                                            | 7.4                              | -                                 |                                      |
|                                  |                           |                                                 |                           | 2005-2009    | -                                                            | 7.4                              | -                                 |                                      |
|                                  |                           |                                                 |                           | 2000-2004    | -                                                            | 7.3                              | -                                 |                                      |
|                                  |                           |                                                 |                           | 2008-2013    | -                                                            | 5                                | -                                 |                                      |
|                                  |                           |                                                 |                           | 2000-2007    | -                                                            | 5                                | -                                 |                                      |
|                                  |                           |                                                 |                           | 2010         | 4                                                            | 2.2                              | -                                 |                                      |
|                                  |                           |                                                 |                           | 1995-2012    | 428                                                          | 2.7                              | -                                 |                                      |
|                                  |                           |                                                 |                           | 2003-2005    | -                                                            | 2.4                              | -                                 |                                      |
|                                  |                           |                                                 |                           | 2002-2004    | 70                                                           | 2.7                              | 10.5                              |                                      |
|                                  |                           |                                                 |                           | 2010         | 0                                                            | 0                                | -                                 |                                      |
|                                  |                           |                                                 |                           | 2010-2014    | 366                                                          | 7.7                              | -                                 |                                      |
|                                  |                           |                                                 |                           | 2005-2009    | 371                                                          | 7.7                              | -                                 |                                      |
|                                  |                           |                                                 |                           | 2000-2004    | 294                                                          | 5.9                              | -                                 |                                      |
|                                  |                           |                                                 |                           | 2000-2007    | -                                                            | 6                                | -                                 |                                      |
|                                  |                           |                                                 |                           | 2000-2003    | -                                                            | 3.9                              | -                                 |                                      |
|                                  |                           |                                                 |                           | 2006-2011    | -                                                            | 2.6                              | -                                 |                                      |
|                                  |                           |                                                 |                           | 2000-2005    | [343, 1988-2011]                                             | 1.5                              | -                                 |                                      |
|                                  |                           |                                                 |                           | 2002-2003    | 49                                                           | 9.5                              | -                                 |                                      |
|                                  |                           |                                                 |                           | 2005-2009    | 14                                                           | 4.4                              | -                                 |                                      |
|                                  |                           |                                                 |                           | 2004-2006    | -                                                            | 1.1                              | -                                 |                                      |
|                                  |                           |                                                 |                           | 2011-2013    | -                                                            | -                                | ~30                               |                                      |
|                                  |                           |                                                 |                           | 2007-2011    | 88                                                           | 5.2                              | -                                 |                                      |
|                                  |                           |                                                 |                           | 2007-2009    | 265                                                          | 2.3                              | -                                 |                                      |
|                                  |                           |                                                 |                           | 2002-2006    | -                                                            | 4.8                              | -                                 |                                      |
|                                  |                           |                                                 |                           | 2001-2010    | [61 in 1951-2010]                                            | 2.4                              | -                                 |                                      |
|                                  |                           |                                                 |                           | 1995-2009    | 61                                                           | 6                                | -                                 |                                      |
|                                  |                           |                                                 |                           | 2000-2010    | 129                                                          | 1.1                              | -                                 |                                      |
|                                  |                           |                                                 |                           | 2010         | 3                                                            | 1.1                              | -                                 |                                      |
|                                  |                           |                                                 |                           | 2006-2011    | -                                                            | 1.5                              | -                                 |                                      |
|                                  |                           |                                                 |                           | 2002-2003    | 49                                                           | 9.5                              | -                                 |                                      |
|                                  |                           |                                                 |                           | 2005-2009    | 14                                                           | 4.4                              | -                                 |                                      |
|                                  |                           |                                                 |                           | 2004-2006    | -                                                            | 1.1                              | -                                 |                                      |
|                                  |                           |                                                 |                           | 2011-2013    | -                                                            | -                                | ~30                               |                                      |
|                                  |                           |                                                 |                           | 2007-2011    | 88                                                           | 5.2                              | -                                 |                                      |
|                                  |                           |                                                 |                           | 2007-2009    | 265                                                          | 2.3                              | -                                 |                                      |
|                                  |                           |                                                 |                           | 2002-2006    | -                                                            | 4.8                              | -                                 |                                      |
|                                  |                           |                                                 |                           | 2001-2010    | [61 in 1951-2010]                                            | 2.4                              | -                                 |                                      |
|                                  |                           |                                                 |                           | 1995-2009    | 61                                                           | 6                                | -                                 |                                      |
|                                  |                           |                                                 |                           | 2000-2010    | 129                                                          | 1.1                              | -                                 |                                      |
|                                  |                           |                                                 |                           | 2010         | 3                                                            | 1.1                              | -                                 |                                      |
|                                  |                           |                                                 |                           | 2002-2003    | 49                                                           | 9.5                              | -                                 |                                      |
|                                  |                           |                                                 |                           | 2005-2009    | 14                                                           | 4.4                              | -                                 |                                      |
|                                  |                           |                                                 |                           | 2004-2006    | -                                                            | 1.1                              | -                                 |                                      |
|                                  |                           |                                                 |                           | 2011-2013    | -                                                            | -                                | ~30                               |                                      |
|                                  |                           |                                                 |                           | 2007-2011    | 88                                                           | 5.2                              | -                                 |                                      |
|                                  |                           |                                                 |                           | 2007-2009    | 265                                                          | 2.3                              | -                                 |                                      |
|                                  |                           |                                                 |                           | 2002-2006    | -                                                            | 4.8                              | -                                 |                                      |
|                                  |                           |                                                 |                           | 2001-2010    | [61 in 1951-2010]                                            | 2.4                              | -                                 |                                      |
|                                  |                           |                                                 |                           | 1995-2009    | 61                                                           | 6                                | -                                 |                                      |
|                                  |                           |                                                 |                           | 2000-2010    | 129                                                          | 1.1                              | -                                 |                                      |
|                                  |                           |                                                 |                           | 2010         | 3                                                            | 1.1                              | -                                 |                                      |
|                                  |                           |                                                 |                           | 2002-2003    | 49                                                           | 9.5                              | -                                 |                                      |
|                                  |                           |                                                 |                           | 2005-2009    | 14                                                           | 4.4                              | -                                 |                                      |
|                                  |                           |                                                 |                           | 2004-2006    | -                                                            | 1.1                              | -                                 |                                      |
|                                  |                           |                                                 |                           | 2011-2013    | -                                                            | -                                | ~30                               |                                      |
|                                  |                           |                                                 |                           | 2007-2011    | 88                                                           | 5.2                              | -                                 |                                      |
|                                  |                           |                                                 |                           | 2007-2009    | 265                                                          | 2.3                              | -                                 |                                      |
|                                  |                           |                                                 |                           | 2002-2006    | -                                                            | 4.8                              | -                                 |                                      |
|                                  |                           |                                                 |                           | 2001-2010    | [61 in 1951-2010]                                            | 2.4                              | -                                 |                                      |
|                                  |                           |                                                 |                           | 1995-2009    | 61                                                           | 6                                | -                                 |                                      |
|                                  |                           |                                                 |                           | 2000-2010    | 129                                                          | 1.1                              | -                                 |                                      |
|                                  |                           |                                                 |                           | 2010         | 3                                                            | 1.1                              | -                                 |                                      |
|                                  |                           |                                                 |                           | 2002-2003    | 49                                                           | 9.5                              | -                                 |                                      |
|                                  |                           |                                                 |                           | 2005-2009    | 14                                                           | 4.4                              | -                                 |                                      |
|                                  |                           |                                                 |                           | 2004-2006    | -                                                            | 1.1                              | -                                 |                                      |
|                                  |                           |                                                 |                           | 2011-2013    | -                                                            | -                                | ~30                               |                                      |
|                                  |                           |                                                 |                           | 2007-2011    | 88                                                           | 5.2                              | -                                 |                                      |
|                                  |                           |                                                 |                           | 2007-2009    | 265                                                          | 2.3                              | -                                 |                                      |
|                                  |                           |                                                 |                           | 2002-2006    | -                                                            | 4.8                              | -                                 |                                      |
|                                  |                           |                                                 |                           | 2001-2010    | [61 in 1951-2010]                                            | 2.4                              | -                                 |                                      |
|                                  |                           |                                                 |                           | 1995-2009    | 61                                                           | 6                                | -                                 |                                      |
|                                  |                           |                                                 |                           | 2000-2010    | 129                                                          | 1.1                              | -                                 |                                      |
|                                  |                           |                                                 |                           | 2010         | 3                                                            | 1.1                              | -                                 |                                      |
|                                  |                           |                                                 |                           | 2002-2003    | 49                                                           | 9.5                              | -                                 |                                      |
|                                  |                           |                                                 |                           | 2005-2009    | 14                                                           | 4.4                              | -                                 |                                      |
|                                  |                           |                                                 |                           | 2004-2006    | -                                                            | 1.1                              | -                                 |                                      |
|                                  |                           |                                                 |                           | 2011-2013    | -                                                            | -                                | ~30                               |                                      |
|                                  |                           |                                                 |                           | 2007-2011    | 88                                                           | 5.2                              | -                                 |                                      |
|                                  |                           |                                                 |                           | 2007-2009    | 265                                                          | 2.3                              | -                                 |                                      |
|                                  |                           |                                                 |                           | 2002-2006    | -                                                            | 4.8                              | -                                 |                                      |
|                                  |                           |                                                 |                           | 2001-2010    | [61 in 1951-2010]                                            | 2.4                              | -                                 |                                      |
|                                  |                           |                                                 |                           | 1995-2009    | 61                                                           | 6                                | -                                 |                                      |
|                                  |                           |                                                 |                           | 2000-2010    | 129                                                          | 1.1                              | -                                 |                                      |
|                                  |                           |                                                 |                           | 2010         | 3                                                            | 1.1                              | -                                 |                                      |
|                                  |                           |                                                 |                           | 2002-2003    | 49                                                           | 9.5                              | -                                 |                                      |
|                                  |                           |                                                 |                           | 2005-2009    | 14                                                           | 4.4                              | -                                 |                                      |
|                                  |                           |                                                 |                           | 2004-2006    | -                                                            | 1.1                              | -                                 |                                      |
|                                  |                           |                                                 |                           | 2011-2013    | -                                                            | -                                | ~30                               |                                      |
|                                  |                           |                                                 |                           | 2007-2011    | 88                                                           | 5.2                              | -                                 |                                      |
|                                  |                           |                                                 |                           | 2007-2009    | 265                                                          | 2.3                              | -                                 |                                      |
|                                  |                           |                                                 |                           | 2002-2006    | -                                                            | 4.8                              | -                                 |                                      |
|                                  |                           |                                                 |                           | 2001-2010    | [61 in 1951-2010]                                            | 2.4                              | -                                 |                                      |
|                                  |                           |                                                 |                           | 1995-2009    | 61                                                           | 6                                | -                                 |                                      |
|                                  |                           |                                                 |                           | 2000-2010    | 129                                                          | 1.1                              | -                                 |                                      |
|                                  |                           |                                                 |                           | 2010         | 3                                                            | 1.1                              | -                                 |                                      |
|                                  |                           |                                                 |                           | 2002-2003    | 49                                                           | 9.5                              | -                                 |                                      |
|                                  |                           |                                                 |                           | 2005-2009    | 14                                                           | 4.4                              | -                                 |                                      |
|                                  |                           |                                                 |                           | 2004-2006    | -                                                            | 1.1                              | -                                 |                                      |
|                                  |                           |                                                 |                           | 2011-2013    | -                                                            | -                                | ~30                               |                                      |
|                                  |                           |                                                 |                           | 2007-2011    | 88                                                           | 5.2                              | -                                 |                                      |
|                                  |                           |                                                 |                           | 2007-2009    | 265                                                          | 2.3                              | -                                 |                                      |
|                                  |                           |                                                 |                           | 2002-2006    | -                                                            | 4.8                              | -                                 |                                      |
|                                  |                           |                                                 |                           | 2001-2010    | [61 in 1951-2010]                                            | 2.4                              | -                                 |                                      |
|                                  |                           |                                                 |                           | 1995-2009    | 61                                                           | 6                                | -                                 |                                      |
|                                  |                           |                                                 |                           | 2000-2010    | 129                                                          | 1.1                              | -                                 |                                      |
|                                  |                           |                                                 |                           | 2010         | 3                                                            | 1.1                              | -                                 |                                      |
|                                  |                           |                                                 |                           | 2002-2003    | 49                                                           | 9.5                              | -                                 |                                      |
|                                  |                           |                                                 |                           | 2005-2009    | 14                                                           | 4.4                              | -                                 |                                      |
|                                  |                           |                                                 |                           | 2004-2006    | -                                                            | 1.1                              | -                                 |                                      |
|                                  |                           |                                                 |                           | 2011-2013    | -                                                            | -                                | ~30                               |                                      |
|                                  |                           |                                                 |                           | 2007-2011    | 88                                                           | 5.2                              | -                                 |                                      |
|                                  |                           |                                                 |                           | 2007-2009    | 265                                                          | 2.3                              | -                                 |                                      |
|                                  |                           |                                                 |                           | 2002-2006    | -                                                            | 4.8                              | -                                 |                                      |
|                                  |                           |                                                 |                           | 2001-2010    | [61 in 1951-2010]                                            | 2.4                              | -                                 |                                      |
|                                  |                           |                                                 |                           | 1995-2009    | 61                                                           | 6                                | -                                 |                                      |
|                                  |                           |                                                 |                           | 2000-2010    | 129                                                          | 1.1                              | -                                 |                                      |
|                                  |                           |                                                 |                           | 2010         | 3                                                            | 1.1                              | -                                 |                                      |
|                                  |                           |                                                 |                           | 2002-2003    | 49                                                           | 9.5                              | -                                 |                                      |
|                                  |                           |                                                 |                           | 2005-2009    | 14                                                           | 4.4                              | -                                 |                                      |
|                                  |                           |                                                 |                           | 2004-2006    | -                                                            | 1.1                              | -                                 |                                      |
|                                  |                           |                                                 |                           | 2011-2013    | -                                                            | -                                | ~30                               |                                      |
|                                  |                           |                                                 |                           | 2007-2011    | 88                                                           | 5.2                              | -                                 |                                      |
|                                  |                           |                                                 |                           | 2007-2009    | 265                                                          | 2.3                              | -                                 |                                      |
|                                  |                           |                                                 |                           | 2002-2006    | -                                                            | 4.8                              | -                                 |                                      |
|                                  |                           |                                                 |                           | 2001-2010    | [61 in 1951-2010]                                            | 2.4                              | -                                 |                                      |
|                                  |                           |                                                 |                           | 1995-2009    | 61                                                           | 6                                | -                                 |                                      |
|                                  |                           |                                                 |                           | 2000-2010    | 129                                                          | 1.1                              | -                                 |                                      |
|                                  |                           |                                                 |                           | 2010         | 3                                                            | 1.1                              | -                                 |                                      |
|                                  |                           |                                                 |                           | 2002-2003    | 49                                                           | 9.5                              | -                                 |                                      |
|                                  |                           |                                                 |                           | 2005-2009    | 14                                                           | 4.4                              | -                                 |                                      |
|                                  |                           |                                                 |                           | 2004-2006    | -                                                            | 1.1                              | -                                 |                                      |
|                                  |                           |                                                 |                           | 2011-2013    | -                                                            | -                                | ~30                               |                                      |
|                                  |                           |                                                 |                           | 2007-2011    | 88                                                           | 5.2                              | -                                 |                                      |
|                                  |                           |                                                 |                           | 2007-2009    | 265                                                          | 2.3                              | -                                 |                                      |
|                                  |                           |                                                 |                           | 2002-2006    | -                                                            | 4.8                              | -                                 |                                      |
|                                  |                           |                                                 |                           | 2001-2010    | [61 in 1951-2010]                                            | 2.4                              | -                                 |                                      |
|                                  |                           |                                                 |                           | 1995-2009    | 61                                                           | 6                                | -                                 |                                      |
|                                  |                           |                                                 |                           | 2000-2010    | 129                                                          | 1.1                              | -                                 |                                      |
|                                  |                           |                                                 |                           | 2010         | 3                                                            | 1.1                              | -                                 |                                      |
|                                  |                           |                                                 |                           | 2002-2003    | 49                                                           | 9.5                              | -                                 |                                      |
|                                  |                           |                                                 |                           | 2005-2009    | 14                                                           | 4.4                              | -                                 |                                      |
|                                  |                           |                                                 |                           | 2004-2006    | -                                                            | 1.1                              | -                                 |                                      |
|                                  |                           |                                                 |                           | 2011-2013    | -                                                            | -                                | ~30                               |                                      |
|                                  |                           |                                                 |                           | 2007-2011    | 88                                                           | 5.2                              | -                                 |                                      |
|                                  |                           |                                                 |                           | 2007-2009    | 265                                                          | 2.3                              | -                                 |                                      |
|                                  |                           |                                                 |                           | 2002-2006    | -                                                            | 4.8                              | -                                 |                                      |
|                                  |                           |                                                 |                           | 2001-2010    | [61 in 1951-2010]                                            | 2.4                              | -                                 |                                      |
|                                  |                           |                                                 |                           | 1995-2009    | 61                                                           | 6                                | -                                 |                                      |
|                                  |                           |                                                 |                           | 2000-2010    | 129                                                          | 1.1                              | -                                 |                                      |
|                                  |                           |                                                 |                           | 2010         | 3                                                            | 1.1                              | -                                 |                                      |
|                                  |                           |                                                 |                           | 2002-2003    | 49                                                           | 9.5                              | -                                 |                                      |
|                                  |                           |                                                 |                           | 2005-2009    | 14                                                           | 4.4                              | -                                 |                                      |
|                                  |                           |                                                 |                           | 2004-2006    | -                                                            | 1.1                              | -                                 |                                      |
|                                  |                           |                                                 |                           | 2011-2013    | -                                                            | -                                | ~30                               |                                      |
|                                  |                           |                                                 |                           | 2007-2011    | 88                                                           | 5.2                              | -                                 |                                      |
|                                  |                           |                                                 |                           | 2007-2009    | 265                                                          | 2.3                              | -                                 |                                      |
|                                  |                           |                                                 |                           | 2002-2006    | -                                                            | 4.8                              | -                                 |                                      |
|                                  |                           |                                                 |                           | 2001-2010    | [61 in 1951-2010]                                            | 2.4                              | -                                 |                                      |
|                                  |                           |                                                 |                           | 1995-2009    | 61                                                           | 6                                | -                                 |                                      |
|                                  |                           |                                                 |                           | 2000-2010    | 129                                                          | 1.1                              | -                                 |                                      |
|                                  |                           |                                                 |                           | 2010         | 3                                                            | 1.1                              | -                                 |                                      |
|                                  |                           |                                                 |                           | 2002-2003    | 49                                                           | 9.5                              | -                                 |                                      |
|                                  |                           |                                                 |                           | 2005-2009    | 14                                                           | 4.4                              | -                                 |                                      |
|                                  |                           |                                                 |                           | 2004-2006    | -                                                            | 1.1                              | -                                 |                                      |
| </                               |                           |                                                 |                           |              |                                                              |                                  |                                   |                                      |

## Appendix 3. Continued

| Country                          | City/Region           | Study information sources & design <sup>a</sup> | Patient age group [years] | Study period | No. of patients in cited years [or over entire study period] | Incidence per 100 000 population | Prevalence per 100 000 population | Authors & reference                                      |
|----------------------------------|-----------------------|-------------------------------------------------|---------------------------|--------------|--------------------------------------------------------------|----------------------------------|-----------------------------------|----------------------------------------------------------|
| Italy                            | Forlì                 | HR, Lab, Ret, ICV <sup>b</sup>                  | 0-19                      | 1993-2013    | -                                                            | 3.0                              | -                                 | Valpiani D <i>et al</i> , 2018 <sup>79</sup>             |
| Italy                            | National              | HR, Lab, Pro, ICV <sup>c</sup>                  | 0-17                      | 1996-2003    | 810                                                          | 1.0                              | -                                 | Castro M <i>et al</i> , 2008 <sup>80</sup>               |
| Moldova                          | Chisinau              | HR, Lab, Pro, ICV                               | 0-14                      | 2010         | 16                                                           | 2.7                              | -                                 | Burisch J <i>et al</i> , 2014 <sup>21</sup>              |
| Netherlands                      | National              | HR, Lab, Pro, ICV                               | 0-17                      | 1999-2001    | -                                                            | 1.6                              | -                                 | Van der Zaag-Loonen HJ <i>et al</i> , 2004 <sup>25</sup> |
| Norway                           | Oslo                  | HR, Lab, SPC, Pro, ICV                          | 0-17                      | 2005-2007    | 19                                                           | 3.6                              | -                                 | Perminow G <i>et al</i> , 2009 <sup>81</sup>             |
| Norway                           | Akershus              | HR, Lab, Pro, ICV                               | 0-15                      | 1999-2004    | 9                                                            | 2.1                              | -                                 | Perminow G <i>et al</i> , 2006 <sup>39</sup>             |
| Poland                           | National              | HR, Lab, Ret, ICV                               | 0-18                      | 2002-2004    | 231                                                          | 1.3                              | -                                 | Karolewska-Bochenek K <i>et al</i> , 2009 <sup>83</sup>  |
| Slovenia                         | National              | HR, Lab, Ret, ICV                               | 0-18                      | 2002-2010    | 105                                                          | 2.9                              | -                                 | Urlep D <i>et al</i> , 2015 <sup>84</sup>                |
| Slovenia                         | North East            | HR, Lab, Ret, ICV                               | 0-18                      | 2002-2010    | 39                                                           | 2.8                              | -                                 | Urlep D <i>et al</i> , 2014 <sup>85</sup>                |
| Slovenia                         | Western               | HR, Lab, Ret, ICV                               | 0-18                      | 2000-2005    | 25                                                           | 1.6                              | -                                 | Orel R <i>et al</i> , 2009 <sup>86</sup>                 |
| Spain                            | Vigo                  | HR, Lab, Pro, ICV <sup>b</sup>                  | 0-14                      | 2010         | -                                                            | 4.0                              | -                                 | Fernández A <i>et al</i> , 2015 <sup>40</sup>            |
| Spain                            | National, 78 centres  | HR, Ret                                         | 0-17                      | 2009         | -                                                            | 0.9                              | -                                 | Martín-de-Carpi J <i>et al</i> , 2013 <sup>87</sup>      |
| Spain                            | Madrid                | HR, Lab, Pro, ICV <sup>b</sup>                  | 0-14                      | 2003-2005    | -                                                            | 2.1                              | -                                 | López-Serrano P <i>et al</i> , 2009 <sup>88</sup>        |
| Spain                            | Oviedo                | HR, Lab, Reg, Pro, ICV <sup>b</sup>             | 0-15                      | 2000-2002    | -                                                            | 1.7                              | -                                 | Rodrigo L <i>et al</i> , 2004 <sup>80</sup>              |
| Spain                            | Navarra               | HR, Lab, Pro, ICV <sup>b</sup>                  | 0-14                      | 2001-2003    | 2                                                            | 0.9                              | -                                 | Arin Letamendia A <i>et al</i> , 2008 <sup>89</sup>      |
| Sweden                           | National              | AHD, Ret                                        | 0-17                      | 2010         | 585                                                          | -                                | 30                                | Ludvigsson JF <i>et al</i> , 2017 <sup>30</sup>          |
| Sweden                           | Uppsala County        | HR, Lab, Ret, ICV <sup>b</sup>                  | 0-16                      | 2005-2009    | -                                                            | 8.9                              | -                                 | Sjöberg D <i>et al</i> , 2014 <sup>23</sup>              |
| Sweden                           | Uppsala County        | HR, Lab, AHD, Pro, ICV <sup>b</sup>             | 0-19                      | 2005-2007    | -                                                            | 10                               | -                                 | Rönblom A <i>et al</i> , 2010 <sup>150</sup>             |
| Sweden                           | Stockholm County      | HR, Lab, Ret, ICV                               | 0-15                      | 2002-2007    | 29                                                           | 2.8                              | -                                 | Malmberg P <i>et al</i> , 2013 <sup>14</sup>             |
| Switzerland                      | Canton of Vaud        | HR, Lab, Ret, ICV <sup>b</sup>                  | 0-19                      | 2003-2005    | -                                                            | -                                | 15                                | Juillerat P <i>et al</i> , 2008 <sup>91</sup>            |
| UK - England                     | Wessex region         | HR, Lab, Ret                                    | 0-16                      | 2008-2012    | 69                                                           | 2.7                              | -                                 | Ashron JJ <i>et al</i> , 2014 <sup>34</sup>              |
| UK - Scotland                    | National              | HR, Lab, Pro, ICV                               | 0-15                      | 2002-2006    | 52                                                           | 2.0                              | -                                 | Henderson P <i>et al</i> , 2012 <sup>92</sup>            |
| UK - Wales                       | Cardiff & Vale region | HR, Lab, Ret, ICV                               | 0-15                      | 2003-2008    | 115                                                          | 2.1                              | -                                 | Ahmed M <i>et al</i> , 2006 <sup>95</sup>                |
| Study periods from 1970 to 1999: |                       |                                                 |                           |              | 11                                                           | 1.5                              | -                                 |                                                          |
| Belgium                          | Liège                 | HR, Lab, Pro, ICV <sup>b</sup>                  | 0-19                      | 1963-1996    | -                                                            | 1.2                              | -                                 | Latour P <i>et al</i> , 1998 <sup>96</sup>               |
| Czech Republic                   | 25 centres            | HR, Lab, Pro, ICV                               | 0-15                      | 1990-2001    | 202                                                          | 0.6                              | -                                 | Pozler O <i>et al</i> , 2006 <sup>37</sup>               |
|                                  |                       |                                                 |                           | 1994-1997    | 6                                                            | 0.9                              | -                                 |                                                          |
| Czech Republic                   | Moravia Eastern       | HR, Lab, Ret, ICV                               | 0-14                      | 1990-1993    | 5                                                            | 0.7                              | -                                 | Kolek A <i>et al</i> , 2004 <sup>67</sup>                |
| Denmark                          | Eastern               | HR, AHD, Reg, Pro, ICV                          | 0-14                      | 1998-2000    | 50                                                           | 1.8                              | 8.3                               | Jakobsen C <i>et al</i> , 2008 <sup>28</sup>             |
| Denmark                          | Eastern               | HR, Lab, Ret, ICV                               | 0-14                      | 1998-2000    | 50                                                           | 1.8                              | -                                 | Urne FU and Paerregaard A, 2002 <sup>98</sup>            |
| Denmark                          | National              | AHD, Ret                                        | 0-16                      | 1995-1999    | -                                                            | 6.9                              | -                                 | Larsen MD <i>et al</i> , 2016 <sup>12</sup>              |

## Appendix 3. Continued

| Country | City/Region          | Study information sources & design <sup>a</sup> | Patient age group [years] | Study period | No. of patients in cited years [or over entire study period] | Incidence per 100 000 population | Prevalence per 100 000 population | Authors & reference                                 |
|---------|----------------------|-------------------------------------------------|---------------------------|--------------|--------------------------------------------------------------|----------------------------------|-----------------------------------|-----------------------------------------------------|
| Denmark | National             | AHD, Ret <sup>b</sup>                           | 0–14                      | 1990–1999    | –                                                            | 3                                | –                                 | Lophaven SN <i>et al</i> , 2017 <sup>66</sup>       |
| Denmark | Faroe Islands        | AHD, Ret <sup>b</sup>                           | 0–19                      | 1980–1989    | –                                                            | 3                                | –                                 | Hammer T <i>et al</i> , 2016 <sup>99</sup>          |
| Denmark | North Jutland County | AHD, Ret                                        | 0–14                      | 1960–2014    | –                                                            | 11                               | –                                 | Jacobsen BA <i>et al</i> , 2006 <sup>100</sup>      |
| Denmark | Copenhagen County    | HR, AHD, Ret, ICV                               | 0–14                      | 1978–2002    | –                                                            | 2.7                              | –                                 | Langholz E <i>et al</i> , 1991 <sup>102</sup>       |
| Denmark | Copenhagen County    | HR, Lab, Ret, ICV <sup>b</sup>                  | 0–15                      | 1962–1987    | –                                                            | 2.0                              | –                                 | Binder V <i>et al</i> , 1982 <sup>31</sup>          |
| Denmark | Faroe Islands        | HR, Lab, SPC, Ret, ICV <sup>b</sup>             | 0–19                      | 1970–1978    | –                                                            | 2.5                              | –                                 | Berner J and Kiaer T, 1986 <sup>20</sup>            |
|         |                      |                                                 |                           | 1964–1983    | –                                                            | 2                                | –                                 |                                                     |
|         |                      |                                                 |                           | 1995–1999    | –                                                            | 3.1                              | –                                 |                                                     |
|         |                      |                                                 |                           | 1991–1994    | –                                                            | 3.0                              | –                                 |                                                     |
|         |                      |                                                 |                           | 1987–1990    | –                                                            | 2.1                              | –                                 |                                                     |
|         |                      |                                                 |                           | 1987–2003    | 880                                                          | 4.5                              | –                                 | Turunen P <i>et al</i> , 2006 <sup>72</sup>         |
|         |                      |                                                 |                           | 1988–1999    | –                                                            | 1                                | –                                 | Lehtinen P <i>et al</i> , 2011 <sup>103</sup>       |
|         |                      |                                                 |                           | 1988–2006    | –                                                            | 1.1                              | –                                 | Molinié F <i>et al</i> , 2004 <sup>104</sup>        |
|         |                      |                                                 |                           | 1988–2002    | –                                                            | 0.8                              | –                                 | Gower-Rousseau C <i>et al</i> , 2013 <sup>105</sup> |
|         |                      |                                                 |                           | 1988–1999    | –                                                            | 0.8                              | –                                 | Gower-Rousseau C <i>et al</i> , 2009 <sup>151</sup> |
|         |                      |                                                 |                           | 1994–1999    | –                                                            | 1.3                              | –                                 | Auvin S <i>et al</i> , 2005 <sup>106</sup>          |
|         |                      |                                                 |                           | 1988–1993    | –                                                            | 1.2                              | –                                 | Bequet E <i>et al</i> , 2017 <sup>13</sup>          |
|         |                      |                                                 |                           | 1994–1997    | 14                                                           | 0.6                              | –                                 | Tourtelier Y <i>et al</i> , 2000 <sup>107</sup>     |
|         |                      |                                                 |                           | 1988–1990    | –                                                            | 1                                | –                                 | Gower-Rousseau C <i>et al</i> , 1994 <sup>108</sup> |
|         |                      |                                                 |                           | 1988–1989    | 7                                                            | 0.5                              | –                                 | Gottrand F <i>et al</i> , 1991 <sup>109</sup>       |
|         |                      |                                                 |                           | 1980–1984    | –                                                            | 0.8                              | –                                 | Dirks E <i>et al</i> , 1994 <sup>152</sup>          |
|         |                      |                                                 |                           | 1990–1994    | 8                                                            | 3.8                              | –                                 | Ladas SD <i>et al</i> , 2005 <sup>153</sup>         |
|         |                      |                                                 |                           | 1977–2001    | –                                                            | 1.2                              | –                                 | Lakatos L <i>et al</i> , 2004 <sup>36</sup>         |
|         |                      |                                                 |                           | 1990–1994    | –                                                            | 5                                | –                                 | Björnsson S <i>et al</i> , 2000 <sup>18</sup>       |
|         |                      |                                                 |                           | 1991–2000    | –                                                            | 2.9                              | –                                 |                                                     |
|         |                      |                                                 |                           | 1981–1990    | –                                                            | 1.2                              | –                                 |                                                     |
|         |                      |                                                 |                           | 1971–1980    | –                                                            | 0.7                              | –                                 | Agnarsson U <i>et al</i> , 2013 <sup>77</sup>       |
|         |                      |                                                 |                           | 1980–1989    | –                                                            | 0.5                              | –                                 | Björnsson S <i>et al</i> , 1998 <sup>110</sup>      |
|         |                      |                                                 |                           | 1998–1999    | –                                                            | 2.0                              | –                                 | Sawcenko A <i>et al</i> , 2003 <sup>111</sup>       |
|         |                      |                                                 |                           | 1990–1993    | –                                                            | 1.2                              | –                                 | Ranzi T <i>et al</i> , 1996 <sup>113</sup>          |
|         |                      |                                                 |                           | 1991–2010    | –                                                            | 1.2                              | –                                 |                                                     |
|         |                      |                                                 |                           | 1981–1990    | –                                                            | 0.5                              | –                                 |                                                     |
|         |                      |                                                 |                           | 1971–1980    | –                                                            | 0.5                              | –                                 |                                                     |
|         |                      |                                                 |                           | 1980–1989    | –                                                            | 2.0                              | –                                 |                                                     |
|         |                      |                                                 |                           | 1990–1994    | –                                                            | 1.2                              | –                                 |                                                     |
|         |                      |                                                 |                           | 1991–2000    | –                                                            | 2.9                              | –                                 |                                                     |
|         |                      |                                                 |                           | 1981–1990    | –                                                            | 1.2                              | –                                 |                                                     |
|         |                      |                                                 |                           | 1971–1980    | –                                                            | 0.7                              | –                                 |                                                     |
|         |                      |                                                 |                           | 1980–1989    | –                                                            | 0.5                              | –                                 |                                                     |
|         |                      |                                                 |                           | 1998–1999    | –                                                            | 2.0                              | –                                 |                                                     |
|         |                      |                                                 |                           | 1990–1993    | –                                                            | 1.2                              | –                                 |                                                     |

## Appendix 3. Continued

| Country        | City/Region                       | Study information sources & design <sup>a</sup> | Patient age group [years] | Study period | No. of patients in cited years [or over entire study period] | Incidence per 100 000 population | Prevalence per 100 000 population | Authors & reference                                 |
|----------------|-----------------------------------|-------------------------------------------------|---------------------------|--------------|--------------------------------------------------------------|----------------------------------|-----------------------------------|-----------------------------------------------------|
| Italy          | Eight cities                      | HR, Lab, SPC, Pro, ICV <sup>b</sup>             | 0–19                      | 1989–1992    | –                                                            | 1.8                              | –                                 | Tragnone A <i>et al</i> , 1996 <sup>114</sup>       |
| Malta          | National                          | HR, Lab, Ret, ICV <sup>b</sup>                  | 0–15                      | 1993–2005    | –                                                            | 1.7                              | –                                 | Cachia E <i>et al</i> , 2008 <sup>115</sup>         |
| Netherlands    | South Limburg                     | HR, Lab, Reg, Pro, ICV <sup>b</sup>             | 0–19                      | 1991–2002    | –                                                            | 2.0                              | –                                 | Romberg-Camps JL <i>et al</i> , 2009 <sup>116</sup> |
| Netherlands    | South Limburg                     | HR, Lab, SPC, PCR, Pro, ICV <sup>b</sup>        | 0–14                      | 1991–1995    | –                                                            | 0.8                              | –                                 | Russel MG <i>et al</i> , 1998 <sup>117</sup>        |
| Norway         | Akershus area                     | HR, Lab, Pro, ICV                               | 0–15                      | 1993–1998    | 15                                                           | 3.7                              | –                                 | Perminow G <i>et al</i> , 2006 <sup>39</sup>        |
| Norway         | South East                        | HR, Lab, Pro, Ret, ICV                          | 0–15                      | 1990–1993    | 14                                                           | 2.0                              | –                                 | Stordal K <i>et al</i> , 2004 <sup>119</sup>        |
| Norway         | South East                        | HR, Lab, Pro, ICV                               | 0–15                      | 1990–1993    | –                                                            | 2.1                              | –                                 | Bentsen BS <i>et al</i> , 2002 <sup>118</sup>       |
| Norway         | Fredrikstad                       | HR, Lab, Pro, ICV <sup>b</sup>                  | 0–14                      | 1990         | –                                                            | 1.1                              | –                                 | Moum B <i>et al</i> , 1995 <sup>121</sup>           |
| Norway         | Northern                          | HR, Lab, SPC, Pro, ICV <sup>b</sup>             | 0–19                      | 1983–1986    | –                                                            | 4.5                              | –                                 | Kildebo S <i>et al</i> , 1990 <sup>154</sup>        |
| Norway         | West, 3 counties                  | HR, Lab, SPC, Pro, ICV                          | 0–15                      | 1984–1985    | 17                                                           | 4.3                              | –                                 | Olafsdottir EJ <i>et al</i> , 1989 <sup>123</sup>   |
| Slovenia       | Western                           | HR, Lab, Ret, ICV                               | 0–18                      | 1994–1999    | 14                                                           | 0.8                              | –                                 | Orel R <i>et al</i> , 2009 <sup>86</sup>            |
| Spain          | National, 78 centres              | HR, Ret <sup>b</sup>                            | 0–17                      | 1996         | –                                                            | 0.4                              | –                                 | Martin-de-Carpi J <i>et al</i> , 2013 <sup>87</sup> |
| Spain          | Aragon                            | HR, Lab, Pro, ICV <sup>b</sup>                  | 0–14                      | 1992–1994    | –                                                            | 0.3                              | –                                 | Lopez Miguel C <i>et al</i> , 1999 <sup>124</sup>   |
| Spain          | Sabadell, Vigo, Mallorca & Morril | HR, Lab, Pro, ICV <sup>b</sup>                  | 0–13                      | 1991–1993    | –                                                            | 0.2                              | –                                 | Brulletta E <i>et al</i> , 1998 <sup>125</sup>      |
| Sweden         | Stockholm County                  | HR, Lab, Pro, ICV                               | 0–15                      | 1990–2001    | –                                                            | 1.7                              | –                                 | Hildebrand H <i>et al</i> , 2003 <sup>17</sup>      |
| Sweden         | North Stockholm County            | HR, Lab, Ret, ICV                               | 0–16                      | 1990–1998    | 27                                                           | 2.1                              | –                                 | Asking J <i>et al</i> , 1999 <sup>32</sup>          |
| Sweden         | Uppsala County                    | HR, Lab, AHD, SPC, Ret, ICV <sup>b</sup>        | 0–19                      | 1964–1983    | –                                                            | 8                                | –                                 | Rönblom A <i>et al</i> , 2010 <sup>50</sup>         |
| Sweden         | Göteborg & South West             | HR, Lab, Ret, ICV                               | 0–15                      | 1983–1987    | –                                                            | 1.9                              | –                                 | Hildebrand H <i>et al</i> , 1994 <sup>127</sup>     |
| Sweden         | Stockholm                         | HR, Lab, Pro, ICV                               | 0–15                      | 1993–1995    | –                                                            | 3.2                              | –                                 | Lindberg E <i>et al</i> , 2000 <sup>26</sup>        |
| Sweden         | National                          | HR, Lab, Pro, ICV                               | 0–15                      | 1984–1986    | –                                                            | 1.4                              | –                                 | Lindberg E <i>et al</i> , 2000 <sup>26</sup>        |
| Sweden         | Ornskoldsvik                      | HR, Lab, Ret, ICV                               | 0–18                      | 1984–1986    | 225                                                          | –                                | 7.5                               | Lindberg H <i>et al</i> , 1991 <sup>128</sup>       |
| Sweden         | Malmö                             | HR, Lab, Ret, ICV                               | 0–19                      | 1961–2005    | 46                                                           | 1.6                              | –                                 | Lindberg J <i>et al</i> , 2008 <sup>155</sup>       |
| Sweden         | Uppsala region                    | AHD, Lab, Ret <sup>b</sup>                      | 0–19                      | 1958–1982    | 83                                                           | 5.1                              | –                                 | Stewénius J <i>et al</i> , 1995 <sup>156</sup>      |
| Sweden         | National                          | HR, Lab, Ret, ICV                               | 0–19                      | 1975–1983    | –                                                            | 4.8                              | –                                 | Ekblom A <i>et al</i> , 1991 <sup>134</sup>         |
| UK and Ireland | National                          | HR, Lab, Reg, Pro                               | 0–15                      | 1965–1974    | –                                                            | 6.2                              | –                                 | Sawczenko A <i>et al</i> , 2003 <sup>111</sup>      |
| UK – England   | National                          | HR, Lab, Reg, Pro                               | 0–15                      | 1998–1999    | 172                                                          | 1.4                              | –                                 | Sawczenko A <i>et al</i> , 2003 <sup>111</sup>      |
| UK – England   | North Tees region                 | HR, Lab, Ret, ICV <sup>b</sup>                  | 0–19                      | 1971–1977    | 13                                                           | 0.6                              | –                                 | Devlin HB <i>et al</i> , 1980 <sup>137</sup>        |
| UK – Scotland  | Tayside                           | HR, Lab, Ret, ICV                               | 0–19                      | 1988–2007    | –                                                            | 5.9                              | –                                 | Steed H <i>et al</i> , 2010 <sup>93</sup>           |
| UK – Scotland  | National                          | HR, Lab, Reg, Pro                               | 0–15                      | 1998–1999    | –                                                            | 1.8                              | –                                 | Sawczenko A <i>et al</i> , 2003 <sup>111</sup>      |
| UK – Scotland  | North East                        | HR, Lab, Ret, ICV                               | 0–16                      | 1990–1999    | –                                                            | 1.5                              | –                                 | Watson AJM <i>et al</i> , 2002 <sup>138</sup>       |

## Appendix 3. Continued

| Country        | City/Region     | Study information sources & design <sup>a</sup> | Patient age group [years] | Study period | No. of patients in cited years [or over entire study period] | Incidence per 100 000 population | Prevalence per 100 000 population | Authors & reference                              |
|----------------|-----------------|-------------------------------------------------|---------------------------|--------------|--------------------------------------------------------------|----------------------------------|-----------------------------------|--------------------------------------------------|
| UK – Scotland  | National        | HR, Lab, AHD, Ret, ICV                          | 0–16                      | 1995         | 101                                                          | –                                | 9.2                               | Armitage E <i>et al</i> , 2001 <sup>139</sup>    |
| UK – Scotland  | National        | HR, Lab, Ret, ICV                               | 0–15                      | 1990–1995    | 93                                                           | 1.6                              | –                                 | Henderson P <i>et al</i> , 2012 <sup>52</sup>    |
|                | North           |                                                 |                           |              | –                                                            | 1.3                              | –                                 |                                                  |
|                | South           |                                                 |                           |              | –                                                            | 1.2                              | –                                 |                                                  |
| UK – Scotland  | National        | AHD, HR, Ret, ICV                               | 0–16                      | 1981–1995    | 197                                                          | 1.3                              | –                                 | Armitage E <i>et al</i> , 2004 <sup>139</sup>    |
| UK – Wales     | National        | HR, Lab, Reg, Pro                               | 0–15                      | 1998–1999    | –                                                            | 1.7                              | –                                 | Sawczenko A <i>et al</i> , 2003 <sup>111</sup>   |
| UK – Wales     | South Glamorgan | HR, Lab, Ret, ICV                               | 0–16                      | 1995–1997    | 11                                                           | 0.8                              | –                                 | Hassan K <i>et al</i> , 2000 <sup>144</sup>      |
|                |                 |                                                 |                           | 1993         | –                                                            | –                                | 3.4                               |                                                  |
|                |                 |                                                 |                           | 1989–1993    | –                                                            | 0.7                              | –                                 |                                                  |
| UK – Wales     | South Glamorgan | HR, Lab, Ret, ICV                               | 0–15                      | 1983–1988    | [7 in 1983–1988]                                             | 0.7                              | –                                 | Cosgrove M, 1996 <sup>33</sup>                   |
|                |                 |                                                 |                           | 1978–1987    | –                                                            | 2.0                              | –                                 |                                                  |
| UK – Wales     | Cardiff         | HR, Lab, SPC, Ret, ICV <sup>b</sup>             | 0–19                      | 1968–1977    | –                                                            | 2.4                              | –                                 | Srivastava ED <i>et al</i> , 1992 <sup>157</sup> |
| UK – N Ireland | National        | HR, Lab, Reg, Pro                               | 0–15                      | 1998–1999    | –                                                            | 1.0                              | –                                 | Sawczenko A <i>et al</i> , 2003 <sup>111</sup>   |

Study sources: HR = hospital/clinical records; Lab = histopathology records; Reg = disease register; SPC = survey of primary care; AHD = administrative hospital data; PCR = primary care records; Pro = prospective surveillance; Ret = retrospective review; ICV = individual case validation.

<sup>a</sup>Incidence and/or prevalence are calculated from graphs presented in the published papers.

<sup>b</sup>Incidence and/or prevalence are calculated from numbers of cases and population cited.



**Appendix 4.** Incidence and prevalence rates paediatric indeterminate colitis reported across Europe: studies ordered alphabetically and then in reverse chronological order: studies grouped since 2000 and from 1970 to 1999

| Country                                 | City/Region                                        | Study information sources & design <sup>a</sup> | Patient age group [years] | Study period | No. of patients in cited years [or over entire study period] | Incidence per 100 000 population | Prevalence per 100 000 population | Authors & reference                                      |
|-----------------------------------------|----------------------------------------------------|-------------------------------------------------|---------------------------|--------------|--------------------------------------------------------------|----------------------------------|-----------------------------------|----------------------------------------------------------|
| <b>Study periods since 2000:</b>        |                                                    |                                                 |                           |              |                                                              |                                  |                                   |                                                          |
| Czech Republic                          | Pilsen region                                      | HR, Lab, Pro, ICV                               | 0–18                      | 2000–2015    | 17                                                           | 1.0                              | –                                 | Scharwz J, 2017 <sup>35</sup>                            |
| Denmark                                 | Eastern                                            | HR, AHD, Reg, Pro, ICV                          | 0–14                      | 2002–2004    | 11                                                           | 0.3                              | 1.5                               | Jakobsen C <i>et al</i> , 2008 <sup>38</sup>             |
| Finland                                 | Helsinki & Tampere                                 | HR, Lab, Ret, ICV                               | 0–17                      | 2000–2003    | [83 in 1987–2003]                                            | 0.9                              | –                                 | Turunen P <i>et al</i> , 2006 <sup>72</sup>              |
| France                                  | North [Nord, Pas-de-Calais, Somme, Seine Maritime] | HR, Lab, Reg, Pro, ICV                          | 0–16                      | 1988–2011    | 37                                                           | 0.3                              | –                                 | Bequet E <i>et al</i> , 2017 <sup>13</sup>               |
| Germany                                 | Saxony                                             | HR, Lab, Reg, Pro, ICV                          | 0–17                      | 2005–2009    | 3                                                            | 0.9                              | –                                 | Zurek M <i>et al</i> , 2018 <sup>73</sup>                |
| Hungary                                 | National                                           | HR, Lab, Pro, ICV                               | 0–15                      | 2007–2009    | 25                                                           | 0.5                              | –                                 | Müller KE <i>et al</i> , 2013 <sup>75</sup>              |
| Iceland                                 | National                                           | HR, Lab, Ret, ICV                               | 0–16                      | 1991–2000    | 2                                                            | 0.3                              | –                                 | Agnarsson U <i>et al</i> , 2013 <sup>77</sup>            |
| Ireland                                 | Dublin                                             | HR, Lab, Pro, ICV                               | 0–15                      | 2000–2010    | 39                                                           | 0.3                              | –                                 | Hope B <i>et al</i> , 2012 <sup>38</sup>                 |
| Italy                                   | National                                           | HR, Lab, Pro, ICV <sup>s</sup>                  | 0–17                      | 1996–2003    | 131                                                          | 0.2                              | –                                 | Castro M <i>et al</i> , 2008 <sup>80</sup>               |
| Netherlands                             | National                                           | HR, Lab, Pro, ICV                               | 0–17                      | 1999–2001    | –                                                            | 1.5                              | –                                 | Van der Zaag-Loonen HJ <i>et al</i> , 2004 <sup>35</sup> |
| Norway                                  | Oslo                                               | HR, Lab, SPC, Pro, ICV                          | 0–17                      | 2005–2007    | 4                                                            | 0.6                              | –                                 | Perminow G <i>et al</i> , 2009 <sup>81</sup>             |
| Norway                                  | Akershus                                           | HR, Lab, Pro, ICV                               | 0–15                      | 1999–2004    | 0                                                            | 0.0                              | –                                 | Perminow G <i>et al</i> , 2006 <sup>39</sup>             |
| Poland                                  | National                                           | HR, Lab, Ret, ICV                               | 0–18                      | 2002–2004    | 144                                                          | 0.8                              | –                                 | Karolewska-Bochenek K <i>et al</i> , 2009 <sup>83</sup>  |
| Slovenia                                | National                                           | HR, Lab, Ret, ICV                               | 0–18                      | 2002–2010    | 105                                                          | 2.9                              | –                                 | Urlep D <i>et al</i> , 2015 <sup>84</sup>                |
| Slovenia                                | North East                                         | HR, Lab, Ret, ICV                               | 0–18                      | 2002–2010    | 3                                                            | 0.2                              | –                                 | Urlep D <i>et al</i> , 2014 <sup>85</sup>                |
| Slovenia                                | Western                                            | HR, Lab, Ret, ICV                               | 0–18                      | 2000–2005    | 14                                                           | 0.8                              | –                                 | Orel R <i>et al</i> , 2009 <sup>86</sup>                 |
| Sweden                                  | National                                           | AHD, Ret                                        | 0–17                      | 2010         | 299                                                          | –                                | 16                                | Ludvigsson JF <i>et al</i> , 2017 <sup>30</sup>          |
| UK – England                            | Wessex region                                      | HR, Lab, Ret                                    | 0–16                      | 2008–2012    | 22                                                           | 0.8                              | –                                 | Ashton JJ <i>et al</i> , 2014 <sup>34</sup>              |
| UK – Scotland                           | National                                           | HR, Lab, Pro, ICV                               | 0–15                      | 2002–2006    | 15                                                           | 0.6                              | –                                 | Henderson P <i>et al</i> , 2012 <sup>92</sup>            |
| UK – Wales                              | Cardiff & Vale region                              | HR, Lab, Ret, ICV                               | 0–15                      | 2003–2008    | 56                                                           | 0.9                              | –                                 | Ahmed M <i>et al</i> , 2006 <sup>85</sup>                |
| <b>Study periods from 1970 to 1999:</b> |                                                    |                                                 |                           |              |                                                              |                                  |                                   |                                                          |
| Czech Republic                          | 25 centres                                         | HR, Lab, Pro, ICV                               | 0–15                      | 1990–2001    | 45                                                           | 0.1                              | –                                 | Pozler O <i>et al</i> , 2006 <sup>37</sup>               |
| Czech Republic                          | Moravia                                            | HR, Lab, Ret, ICV                               | 0–14                      | 1990–2001    | 3                                                            | 0.2                              | –                                 | Kolek A <i>et al</i> , 2004 <sup>87</sup>                |
| Denmark                                 | Eastern                                            | HR, AHD, Reg, Pro, ICV                          | 0–14                      | 1998–2000    | 4                                                            | 0.2                              | 0.8                               | Jakobsen C <i>et al</i> , 2008 <sup>38</sup>             |
| Denmark                                 | Eastern                                            | HR, Lab, Ret, ICV                               | 0–14                      | 1998–2000    | 4                                                            | 0.2                              | –                                 | Urne FU and Paerregaard A, 2002 <sup>88</sup>            |
| Denmark                                 | Faroe Islands                                      | AHD, Ret <sup>b</sup>                           | 0–19                      | 1960–2014    | –                                                            | 3                                | –                                 | Hammer T <i>et al</i> , 2016 <sup>99</sup>               |
|                                         |                                                    |                                                 |                           | 1995–1999    | –                                                            | 1.1                              | –                                 |                                                          |
|                                         |                                                    |                                                 |                           | 1991–1994    | –                                                            | 0.6                              | –                                 |                                                          |
| Finland                                 | Helsinki & Tampere                                 | HR, Lab, Ret, ICV                               | 0–17                      | 1987–1990    | [83 in 1987–2003]                                            | 0.4                              | –                                 | Turunen P <i>et al</i> , 2006 <sup>72</sup>              |

## Appendix 4. Continued

| Country        | City/Region                                        | Study information sources & design <sup>a</sup> | Patient age group [years] | Study period | No. of patients in cited years [or over entire study period] | Incidence per 100 000 population | Prevalence per 100 000 population | Authors & reference                                 |
|----------------|----------------------------------------------------|-------------------------------------------------|---------------------------|--------------|--------------------------------------------------------------|----------------------------------|-----------------------------------|-----------------------------------------------------|
| France         | North [Nord, Pas-de-Calais, Somme, Seine Maritime] | HR, Lab, Pro, ICV                               | 0–16                      | 1988–1999    | 20                                                           | 0.1                              | –                                 | Auvin S <i>et al</i> , 2005 <sup>106</sup>          |
| France         | Brittany                                           | HR, Lab, Pro, ICV                               | 0–16                      | 1994–1997    | 7                                                            | 0.3                              | –                                 | Tourtellier Y <i>et al</i> , 2000 <sup>107</sup>    |
| France         | North [Nord, Pas-de-Calais]                        | HR, Lab, Reg, Pro, ICV                          | 0–16                      | 1988–1989    | 9                                                            | 0.6                              | –                                 | Gottrand F <i>et al</i> , 1991 <sup>109</sup>       |
| Iceland        | National                                           | HR, Lab, Ret, ICV                               | 0–16                      | 1991–2000    | 2                                                            | 0.3                              | –                                 |                                                     |
| Netherlands    | South Limburg                                      | HR, Lab, Reg, Pro, ICV <sup>b</sup>             | 0–19                      | 1991–2002    | –                                                            | 0.2                              | –                                 | Agnarsson U <i>et al</i> , 2013 <sup>77</sup>       |
| Norway         | Akershus                                           | HR, Lab, Pro, ICV                               | 0–15                      | 1993–1998    | 0                                                            | 0.0                              | –                                 | Romberg-Camps JL <i>et al</i> , 2009 <sup>116</sup> |
| Norway         | South East                                         | HR, Lab, Pro, Ret, ICV                          | 0–15                      | 1990–1993    | 0                                                            | 0.0                              | –                                 | Perminow G <i>et al</i> , 2006 <sup>39</sup>        |
| Norway         | West, 3 counties                                   | HR, Lab, SPC, Pro, ICV                          | 0–15                      | 1984–1985    | 0                                                            | 0.0                              | –                                 | Stordal K <i>et al</i> , 2004 <sup>119</sup>        |
| Slovenia       | Western                                            | HR, Lab, Ret, ICV                               | 0–18                      | 1994–1999    | 5                                                            | 0.3                              | –                                 | Olafsdottir EJ <i>et al</i> , 1989 <sup>123</sup>   |
| Sweden         | Stockholm County                                   | HR, Lab, Pro, ICV                               | 0–15                      | 1990–2001    | 5                                                            | 0.2                              | –                                 | Orel R <i>et al</i> , 2009 <sup>86</sup>            |
| Sweden         | North Stockholm County                             | HR, Lab, Ret, ICV                               | 0–16                      | 1990–1998    | 14                                                           | 1.1                              | –                                 | Hildebrand H <i>et al</i> , 2003 <sup>17</sup>      |
| Sweden         | Stockholm                                          | HR, Lab, Pro, ICV <sup>b</sup>                  | 0–15                      | 1993–1995    | –                                                            | 2                                | –                                 | Askling J <i>et al</i> , 1999 <sup>32</sup>         |
| Sweden         | Stockholm                                          | HR, Lab, Pro, ICV <sup>b</sup>                  | 0–15                      | 1984–1986    | –                                                            | 1                                | –                                 | Lindberg E <i>et al</i> , 2000 <sup>126</sup>       |
| Sweden         | National                                           | HR, Lab, Pro, ICV                               | 0–15                      | 1985         | 127                                                          | –                                | 4.2                               | Hildebrand H <i>et al</i> , 1991 <sup>128</sup>     |
| Sweden         | Malmo                                              | HR, Lab, Ret, ICV                               | 0–19                      | 1958–1982    | 24                                                           | –                                | 1.5                               | Stewenius J <i>et al</i> , 1995 <sup>156</sup>      |
| UK and Ireland | National                                           | HR, Lab, Reg, Pro, ICV                          | 0–19                      | 1998–1999    | 72                                                           | 0.6                              | –                                 | Sawczenko A <i>et al</i> , 2003 <sup>111</sup>      |
| UK – England   | National                                           | HR, Lab, Reg, Pro                               | 0–15                      | 1998–1999    | –                                                            | 0.7                              | –                                 | Sawczenko A <i>et al</i> , 2003 <sup>111</sup>      |
| UK – Scotland  | National                                           | HR, Lab, Reg, Pro                               | 0–15                      | 1998–1999    | –                                                            | 0.6                              | –                                 | Sawczenko A <i>et al</i> , 2003 <sup>111</sup>      |
| UK – Scotland  | North East                                         | HR, Lab, Ret, ICV                               | 0–16                      | 1990–1999    | 0                                                            | 0.0                              | –                                 | Watson AJM <i>et al</i> , 2002 <sup>138</sup>       |
| UK – Scotland  | National                                           | HR, Lab, Ret, ICV                               | 0–15                      | 1990–1995    | 0                                                            | 0.0                              | –                                 | Henderson P <i>et al</i> , 2012 <sup>92</sup>       |
| UK – Wales     | National                                           | HR, Lab, Reg, Pro                               | 0–15                      | 1998–1999    | –                                                            | 0.3                              | –                                 | Sawczenko A <i>et al</i> , 2003 <sup>111</sup>      |
| UK – Wales     | South Glamorgan                                    | HR, Lab, Ret, ICV                               | 0–16                      | 1995–1997    | 7                                                            | 0.5                              | –                                 | Hassan K <i>et al</i> , 2000 <sup>144</sup>         |
| UK – Wales     | South Glamorgan                                    | HR, Lab, Ret, ICV                               | 0–15                      | 1983–1993    | 0                                                            | 0.0                              | –                                 | Cosgrove M, 1996 <sup>33</sup>                      |
| UK – N Ireland | National                                           | HR, Lab, Reg, Pro                               | 0–15                      | 1998–1999    | –                                                            | 0.2                              | –                                 | Sawczenko A <i>et al</i> , 2003 <sup>111</sup>      |

Study sources: HR = hospital/clinical records; Lab = histopathology records; Reg = disease register; SPC = survey of primary care; AHD = administrative hospital data; PCR = primary care records; Pro = prospective surveillance; Ret = retrospective review; ICV = individual case validation.

<sup>a</sup>Incidence and/or prevalence are calculated from graphs presented in the published papers.

<sup>b</sup>Incidence and/or prevalence are calculated from numbers of cases and population cited.
